# Supplementary material
Source: PubMed Central journal article supplement (PMC3365939)
Supplement: supp_M111.338699_jbc.M111.338699-1.pdf [file supp_M111.338699_jbc.M111.338699-1.pdf]

**Table S1.** Oligonucleotides used in this study.

| Oligo # | Oligo name     | Sequences                                                           |
|---------|----------------|---------------------------------------------------------------------|
| 1       | SL oligo       | ACAGTTTCTGTAATATATTG                                                |
| 2       | DD-RTPCR-R     | ACGTCG AAAATAAATTTAAAN                                              |
| 3       | rRNA-F         | ATCCACTTCGGATTGGTGACCCA                                             |
| 4       | rRNA-R         | GAAGAATGCCTTCGCTGTAGTT                                              |
| 5       | Tubulin-F      | TGCGTGAGATTGTGTGCGTTCAGG                                            |
| 6       | Tubulin-R      | AGTGCAGACGAGGGAACGGCACCA                                            |
| 7       | PK3'UTR-F      | AGTCAAGCTTAAGGTCCATGGATAAAGGGACG                                    |
| 8       | PK3'UTR-R      | AGTCCTCGAGCCCATAGTATCCTTGCCCAATC                                    |
| 9       | R-MTPKup       | CAAGAGCGGCCGCTGCAACAAGCACGATAATAATAA TAACC                          |
| 10      | F-MTPKdown     | GTTGCAGCGGCCGCTCTTGCTTCCTTAATTATATTTTGTATTTG<br>TTC                 |
| 11      | PK-ARE-R       | ACAAGAAGAAATACAAAATATA                                              |
| 12      | TS31310-F      | GGCCTGTGCAGGCCCAAAGCTT                                              |
| 13      | TS31310-R      | CACTCTGAATGTGGAGCCCAAGAC                                            |
| 14      | TS&MASP-R      | AAAATAAATTTAAAATACGCAA                                              |
| 15      | NTF-2-F        | AATTGGTGTGGCTTTTGTGCGGCA                                            |
| 16      | NTF-2-R        | TGTCTTGTGCCAGGTGAAAGACGT                                            |
| 17      | $\beta$ AP-3-F | ACATTGTGTCACGGGCCCGCTCAC                                            |
| 18      | $\beta$ AP-3-R | AGAAATAGCAGCCGTCTTTCGCAC                                            |
| 19      | NRBP-F         | CGGCTGAAGGCGATGCTGCAGTT                                             |
| 20      | NRBP-R         | GCCAACACAATCTTTGCGTAAAGC                                            |
| 21      | KDNA-F         | TTCGACGCACGATGACGGCGCT                                              |
| 22      | KDNA-R         | GATGCCTTGCCTTCGGAGTTGC                                              |
| 23      | GTP-F          | GCGGTGCCGGCATTATTGGTCTCC                                            |
| 24      | GTP-R          | CCTCCAGGTCGGCAAGCACAAAGCT                                           |
| 25      | CYC2-F         | AATATCTGCCGAGGAGTCGTA                                               |
| 26      | CYC2-R         | CATTGCACCTGTAGACATAGCGGT                                            |
| 27      | eGFP-F         | ATTCATGAGTAAAGGAGAAGA                                               |
| 28      | eGFP-R         | TTCTCATTTGTATAGTTCATCC                                              |
| 29      | FAD-F          | TGCTCTGGGAACAGCGTAGA                                                |
| 30      | FAD-R          | ACGCACAGACACGCTCTCTC                                                |
| 31      | T7-WTPK4       | TAATACGACTCACTATAGGGACTTTATTTTATTATTGTTTAAA<br>TTTATTTTTATTTTTATTTT |
| 32      | R-WTPK4        | TCGAGAAAATAAAAATAAAAATAAATTTAAACAATAATCAAA<br>ATAAA                 |
| 33      | T7-MTPK4       | TAATACGACTCACTATAGGGACTTTATGGTGCTTGTTGCAGCG<br>GCCGCTCTTGCTTCC      |
| 34      | R-MTPK4        | TCGAGGGAAGCAAGAGCGGCCGCTGCAACAAGCACCATAAA                           |
| 35      | F-ANCHOR       | GGCCACGCGTCGACTAGTACGGGIIIGGGIIIGGGIIIG                             |
| 36      | MASP-F         | CACACCACCTCCCCTCTTTT                                                |
| 37      | MASP-R         | CGTGCAAAAGAGAGACACCAA                                               |
| 38      | RBP-F          | ATGTACGGTCAGCAGTTTCCA                                               |
| 39      | RBP-R          | ACACGGTTATGATTGCGCTGAC                                              |
| 40      | NH2/AS-ubp1    | ATCGGGCTCGGGGTTTCATCTG                                              |
| 41      | C1             | TGCCCTGTCAAGTGCGTACCC                                               |
| 42      | C2             | AGATGTGAGGCAAGTACACG                                                |
| 43      | Amastin-F      | ACTGCGTCCAATCACCTGT                                                 |
| 44      | Amastin-R      | ACAAAATCGCCATCACCGC                                                 |

Table S2. Genes containing the 43-nt U-rich element in the genome of *T. cruzi*. Only 1.3% of the genes have the element within the ORFs (denoted by negative distances)

| Motif Location             | Upstream Gene          | Distance                          | Gene Product                                                                            |
|----------------------------|------------------------|-----------------------------------|-----------------------------------------------------------------------------------------|
| TcChr29-S:745743..745786   | Tc00.1047053508209.100 |                                   | 262 10 kDa heat shock protein, putative                                                 |
| TcChr29-S:748218..748261   | Tc00.1047053508209.90  |                                   | 278 10 kDa heat shock protein, putative                                                 |
| TcChr18-P:114335..114378   | Tc00.1047053508851.180 |                                   | 156 14-3-3 protein, putative                                                            |
| TcChr38-S:44467..44510     | Tc00.1047053511469.100 |                                   | 28 2-oxoisovalerate dehydrogenase beta subunit, mitochondrial precursor, putative       |
| TcChr29-S:673371..673414   | Tc00.1047053503899.30  |                                   | 12 40S ribosomal protein S16, putative                                                  |
| TcChr24-S:693674..693717   | Tc00.1047053506413.30  |                                   | 35 40S ribosomal protein S33, putative                                                  |
| TcChr26-P:723265..723308   | Tc00.1047053509875.210 |                                   | 31 60S ribosomal protein L17, putative                                                  |
| TcChr38-S:160533..160576   | Tc00.1047053511001.120 |                                   | 419 60S ribosomal protein L18a, putative                                                |
| TcChr38-S:1296745..1299182 | Tc00.1047053511181.100 | 4967, 7404                        | 60S ribosomal protein L2, putative                                                      |
| TcChr38-S:90531..90574     | Tc00.1047053503453.40  |                                   | 215 60S ribosomal protein L30, putative                                                 |
| TcChr29-S:834410..834453   | Tc00.1047053508207.100 |                                   | 756 60S ribosomal protein L7, putative                                                  |
| TcChr5-S:118775..118818    | Tc00.1047053508951.29  | 98, 172                           | actin-like protein, putative                                                            |
| TcChr15-S:54859..54902     | Tc00.1047053511867.140 |                                   | 406 acyl carrier protein, mitochondrial precursor, putative                             |
| TcChr18-P:101226..101269   | Tc00.1047053508851.120 |                                   | 304 ADP-ribosylation factor GTPase activating protein, putative                         |
| TcChr38-S:55837..55880     | Tc00.1047053511469.24  |                                   | 269 ADP-ribosylation factor, putative                                                   |
| TcChr15-S:290645..290688   | Tc00.1047053509233.140 |                                   | 193 aldehyde dehydrogenase (pseudogene), putative                                       |
| TcChr33-S:147829..147872   | Tc00.1047053506829.80  |                                   | 498 alpha/beta-hydrolase, putative                                                      |
| TcChr21-S:301562..301605   | Tc00.1047053507811.100 |                                   | 162 amino acid permease, putative                                                       |
| TcChr35-S:413182..413225   | Tc00.1047053511543.30  |                                   | 2066 amino acid transporter, putative, amino acid permease, putative                    |
| TcChr35-S:501338..501381   | Tc00.1047053511545.80  |                                   | 852 amino acid transporter, putative, amino acid permease, putative                     |
| TcChr36-S:777847..777890   | Tc00.1047053508181.40  |                                   | 252 aminoalcohol phosphotransferase, putative                                           |
| TcChr27-P:222760..222803   | Tc00.1047053508799.240 |                                   | 462 aminopeptidase, putative, metallo-peptidase, Clan MF, Family M17, putative          |
| TcChr24-S:160338..160381   | Tc00.1047053506953.45  |                                   | 274 ascorbate-dependent peroxidase (pseudogene), putative                               |
| TcChr29-S:687466..687509   | Tc00.1047053503899.90  |                                   | 26 asparagine synthetase a, putative                                                    |
| TcChr15-S:298469..298512   | Tc00.1047053509233.180 | 407, 958,                         | 1328 ATPase beta subunit, putative                                                      |
| TcChr29-S:778892..778935   | Tc00.1047053503579.70  |                                   | 535 ATPase subunit 9, putative                                                          |
| TcChr28-S:189299..189342   | Tc00.1047053508387.130 |                                   | 465 ATPase, putative                                                                    |
| TcChr38-S:115677..115720   | Tc00.1047053510997.50  | 167, 429, 1852, 2177, 2540, 3069, | 3432 ATP-dependent DEAD/H RNA helicase (pseudogene), putative                           |
| TcChr15-S:10423..10466     | Tc00.1047053506713.30  |                                   | 235 ATP-dependent DEAD/H RNA helicase, putative                                         |
| TcChr4-S:80365..80408      | Tc00.1047053506553.40  |                                   | 9 ATP-dependent RNA helicase (pseudogene), putative                                     |
| TcChr16-S:330161..330204   | Tc00.1047053506673.60  |                                   | 132 beta-adaptin 3, putative, AP-3 adapter complex beta subunit, putative               |
| TcChr40-P:698255..698298   | Tc00.1047053511277.560 |                                   | 272 calcium-dependent lipid binding protein, putative, synaptotagmin, putative          |
| TcChr24-S:414962..415005   | Tc00.1047053503513.10  |                                   | 379 casein kinase II, alpha chain, putative                                             |
| TcChr38-S:343724..343844   | Tc00.1047053504929.10  | 148, 268, 409, 454,               | 1306 casein kinase, delta isoform, putative                                             |
| TcChr13-S:396402..396445   | Tc00.1047053508323.60  |                                   | 129 centrin, putative, Ca2 -binding EF-hand protein, putative                           |
| TcChr29-S:501337..501380   | Tc00.1047053506289.74  |                                   | 662 chaperone DNAJ protein, putative                                                    |
| TcChr38-S:1316839..1320667 | Tc00.1047053508805.30  | 98, 3926                          | choline/ethanolamine kinase (pseudogene), putative                                      |
| TcChr4-P:87317..87360      | Tc00.1047053509715.30  |                                   | 118 cullin-like protein, putative                                                       |
| TcChr28-S:122281..122324   | Tc00.1047053508385.30  | 1669, 2185,                       | 2640 CYC2-like cyclin, putative                                                         |
| TcChr15-S:392449..392492   | Tc00.1047053509455.140 |                                   | 318, 389 cyclin, putative                                                               |
| TcChr41-P:2304335..2304378 | Tc00.1047053510355.269 |                                   | 1297 cytochrome b5, putative                                                            |
| TcChr41-S:2305535..2305578 | Tc00.1047053506753.110 |                                   | 97 cytochrome b5-like, putative                                                         |
| TcChr15-S:17554..17597     | Tc00.1047053509231.10  |                                   | 1108 cytochrome P450, putative                                                          |
| TcChr21-S:322601..322644   | Tc00.1047053507811.20  |                                   | 466 delta-adaptin, putative, adaptor complex protein AP-3 delta subunit 1, putative     |
| TcChr11-P:319166..319209   | Tc00.1047053506983.60  |                                   | 1115 DNA excision repair protein, putative, SNF2 family helicase-like protein, putative |
| TcChr15-S:375772..375815   | Tc00.1047053509455.70  | 40, 249                           | DNA polymerase delta subunit 2, putative                                                |
| TcChr30-P:339601..339644   | Tc00.1047053510131.70  |                                   | 188 DNA polymerase kappa, putative, DNA polymerase IV, putative                         |
| TcChr29-S:771449..771492   | Tc00.1047053503579.30  |                                   | 498 DNA polymerase sigma-like protein, putative                                         |
| TcChr28-S:201117..201160   | Tc00.1047053508387.170 | 372, 1303                         | double-strand-break repair protein rad21 homolog, putative                              |

|                            |                        |                                                                              |
|----------------------------|------------------------|------------------------------------------------------------------------------|
| TcChr28-P:201394..201437   | Tc00.1047053506789.130 | 1062 double-strand-break repair protein rad21 homolog, putative              |
| TcChr37-S:732408..732451   | Tc00.1047053504625.50  | 353 dual specificity protein phosphatase or MAP kinase phosphatase, putative |
| TcChr28-S:126556..126599   | Tc00.1047053508385.40  | 480, 659 dual specificity protein phosphatase, putative                      |
| TcChr36-S:574688..574731   | Tc00.1047053503671.39  | 14130 dynamin, putative                                                      |
| TcChr15-S:76005..76048     | Tc00.1047053511871.4   | 541 dynein heavy chain, putative                                             |
| TcChr22-S:581829..581872   | Tc00.1047053509769.148 | 127 dynein heavy chain, putative                                             |
| TcChr30-S:288613..288656   | Tc00.1047053504073.10  | 1830 endonuclease/exonuclease/phosphatase, putative                          |
| TcChr25-S:109610..109653   | Tc00.1047053508837.189 | 285 endoplasmic reticulum oxidoreductin, putative                            |
| TcChr32-S:608076..608119   | Tc00.1047053506941.9   | 11112 endosomal trafficking protein RME-8, putative                          |
| TcChr33-S:62157..62200     | Tc00.1047053511585.190 | 371 eukaryotic initiation factor 4a, putative                                |
| TcChr36-S:1067646..1067689 | Tc00.1047053504119.10  | 52 eukaryotic translation initiation factor 5, putative                      |
| TcChr30-S:569735..569778   | Tc00.1047053509205.30  | 613 eukaryotic translation initiation factor, putative                       |
| TcChr14-S:69254..69297     | Tc00.1047053506181.90  | 117 F-actin capping protein, putative,CapZ-alpha, putative                   |
| TcChr24-S:256997..257040   | Tc00.1047053429257.20  | 612 fatty acid desaturase, putative                                          |
| TcChr11-P:294139..294182   | Tc00.1047053511245.160 | 741 fatty acid elongase, putative                                            |
| TcChr12-P:284408..284451   | Tc00.1047053509561.20  | 1391 flagellum-adhesion glycoprotein, putative                               |
| TcChr17-S:349157..349200   | Tc00.1047053511313.30  | 375 formin, putative                                                         |
| TcChr15-S:89662..89705     | Tc00.1047053511871.80  | 325, 473, 752 frataxin-like, mitochondrial precursor, putative               |
| TcChr8-P:313826..313869    | Tc00.1047053508351.10  | 246 fructose-1,6-bisphosphatase, cytosolic, putative                         |
| TcChr34-P:615146..615189   | Tc00.1047053506559.300 | 410 G-actin binding protein, putative,twinfilin, putative                    |
| TcChr15-S:63472..63515     | Tc00.1047053511867.190 | 253 gamma-tubulin, putative                                                  |
| TcChr24-S:157632..157675   | Tc00.1047053436535.19  | 731 Glucose-6-phosphate dehydrogenase, putative                              |
| TcChr34-S:55562..55605     | Tc00.1047053507875.20  | 1292 glutamate dehydrogenase, putative                                       |
| TcChr21-S:199124..199167   | Tc00.1047053508373.10  | 1124 glutamine dependent carbamoyl-phosphate synthase, putative              |
| TcChr21-P:253568..253611   | Tc00.1047053507059.80  | 1125 glutamine-dependent carbamoyl-phosphate synthetase, putative            |
| TcChr28-S:187015..187058   | Tc00.1047053508387.120 | 332 glutaminyl cyclase, putative                                             |
| TcChr29-S:693477..693520   | Tc00.1047053503899.110 | 481 glutathione peroxidase-like protein, putative                            |
| TcChr29-S:695330..695373   | Tc00.1047053503899.130 | 96, 888 glutathione peroxidase-like protein, putative                        |
| TcChr11-P:336219..336262   | Tc00.1047053508865.10  | 1690 glutathione synthetase, putative                                        |
| TcChr29-S:854059..854102   | Tc00.1047053508207.10  | 30, 578 glycine dehydrogenase (pseudogene), putative                         |
| TcChr38-S:15825..15868     | Tc00.1047053511471.90  | 581 glycine dehydrogenase [decarboxylating] (pseudogene), putative           |
| TcChr13-S:156949..156992   | Tc00.1047053506857.10  | 88, 322 glycogen synthase kinase-3 alpha, putative                           |
| TcChr30-S:551121..551164   | Tc00.1047053509203.40  | 209 glycosomal membrane protein, putative                                    |
| TcChr16-S:259948..259991   | Tc00.1047053510283.70  | 356 glycosyl hydrolase-like protein, putative                                |
| TcChr15-S:379128..379171   | Tc00.1047053509455.80  | 63, 117, 935, 988, 1274 GTP-binding nuclear protein rtb2, putative           |
| TcChr23-S:354803..354846   | Tc00.1047053509099.10  | 129 GTP-binding protein, putative                                            |
| TcChr29-S:428510..428553   | Tc00.1047053507747.185 | 4473 H/ACA snoRNA, TC10C1H1                                                  |
| TcChr32-S:699244..699287   | Tc00.1047053511745.10  | 399 heat shock 70 kDa protein, mitochondrial precursor, putative             |
| TcChr15-S:277171..277214   | Tc00.1047053509233.80  | 208, 449 heat shock protein DNAJ, putative                                   |
| TcChr5-S:116867..116910    | Tc00.1047053508951.20  | 259 hexokinase, putative                                                     |
| TcChr40-S:310541..310584   | Tc00.1047053506503.150 | 261 histone H3 variant, putative                                             |
| TcChr18-P:192492..192535   | Tc00.1047053511233.160 | 270 hypothetical protein                                                     |
| TcChr18-P:203393..203436   | Tc00.1047053508853.30  | 270 hypothetical protein                                                     |
| TcChr41-P:626802..626845   | Tc00.1047053506459.140 | 2480 hypothetical protein                                                    |
| TcChr41-P:1687808..1687851 | Tc00.1047053504081.370 | 355 hypothetical protein                                                     |
| TcChr41-P:1900520..1900563 | Tc00.1047053508221.480 | 2576 hypothetical protein                                                    |
| TcChr29-S:466593..466636   | Tc00.1047053506287.120 | 361 hypothetical protein                                                     |
| TcChr29-S:559919..559962   | Tc00.1047053509543.30  | 795 hypothetical protein                                                     |
| TcChr29-S:682702..682745   | Tc00.1047053503899.70  | 134 hypothetical protein                                                     |
| TcChr29-S:691978..692021   | Tc00.1047053503899.100 | 110 hypothetical protein                                                     |
| TcChr29-S:747239..747282   | Tc00.1047053508209.94  | 98 hypothetical protein                                                      |

|                            |                        |                                                  |
|----------------------------|------------------------|--------------------------------------------------|
| TcChr33-P:786646..786689   | Tc00.1047053508115.10  | 1644 hypothetical protein                        |
| TcChr24-S:251565..251608   | Tc00.1047053399033.10  | 118 hypothetical protein                         |
| TcChr24-S:321537..321580   | Tc00.1047053511681.10  | 19 hypothetical protein                          |
| TcChr41-S:624221..624264   | Tc00.1047053504039.210 | 2970 hypothetical protein                        |
| TcChr29-P:345507..345550   | Tc00.1047053511259.30  | 2265 hypothetical protein                        |
| TcChr40-S:1080721..1080764 | Tc00.1047053503457.10  | 903 hypothetical protein                         |
| TcChr38-S:1197565..1232890 | Tc00.1047053511175.20  | 879 hypothetical protein                         |
| TcChr38-S:1277531..1277621 | Tc00.1047053511181.40  | 1278, 1368 hypothetical protein                  |
| TcChr38-S:1300909..1301243 | Tc00.1047053511181.130 | 141, -193 hypothetical protein                   |
| TcChr38-S:1301711..1304807 | Tc00.1047053511181.130 | 609 hypothetical protein                         |
| TcChr38-S:1304807..1304993 | Tc00.1047053511181.140 | 928, 1114 hypothetical protein                   |
| TcChr15-S:26561..26604     | Tc00.1047053509231.30  | 186 hypothetical protein                         |
| TcChr15-S:41415..41458     | Tc00.1047053511867.70  | 90 hypothetical protein                          |
| TcChr15-S:152702..152745   | Tc00.1047053511877.10  | 50, 350 hypothetical protein                     |
| TcChr22-S:566058..566101   | Tc00.1047053510517.110 | 879 hypothetical protein                         |
| TcChr28-S:194750..194793   | Tc00.1047053508387.150 | 72 hypothetical protein                          |
| TcChr28-S:649644..649687   | Tc00.1047053507867.100 | 1061, 2106 hypothetical protein                  |
| TcChr30-S:324010..324053   | Tc00.1047053506931.60  | 130 hypothetical protein                         |
| TcChr30-S:361544..361587   | Tc00.1047053506929.54  | 672 hypothetical protein                         |
| TcChr40-P:866510..866553   | Tc00.1047053508891.50  | 46 hypothetical protein                          |
| TcChr40-P:986626..986669   | Tc00.1047053503939.70  | 465, 508 hypothetical protein                    |
| TcChr17-S:195174..195217   | Tc00.1047053511303.20  | 454 hypothetical protein                         |
| TcChr34-S:773502..773545   | Tc00.1047053506637.80  | 571 hypothetical protein                         |
| TcChr39-P:405015..405058   | Tc00.1047053506629.170 | 254 hypothetical protein                         |
| TcChr39-P:1209324..1209367 | Tc00.1047053508461.142 | 1568, 1614 hypothetical protein                  |
| TcChr25-S:141136..141179   | Tc00.1047053511215.100 | 111 hypothetical protein                         |
| TcChr3-S:178510..178553    | Tc00.1047053507143.90  | 4195 hypothetical protein                        |
| TcChr7-P:186937..186980    | Tc00.1047053503913.40  | 6 hypothetical protein                           |
| TcChr36-S:607884..607927   | Tc00.1047053510325.20  | 1156 hypothetical protein                        |
| TcChr36-S:840327..840370   | Tc00.1047053510311.120 | 341 hypothetical protein                         |
| TcChr30-P:768516..768559   | Tc00.1047053511669.20  | 462 hypothetical protein                         |
| TcChr37-P:764157..764200   | Tc00.1047053509105.50  | 1223 hypothetical protein                        |
| TcChr31-S:462828..462871   | Tc00.1047053509433.10  | 2645 hypothetical protein                        |
| TcChr7-S:187016..187059    | Tc00.1047053508277.280 | 6 hypothetical protein                           |
| TcChr13-P:49051..49094     | Tc00.1047053511807.125 | 1551 hypothetical protein                        |
| TcChr18-P:97176..97219     | Tc00.1047053508851.90  | 212 hypothetical protein, conserved              |
| TcChr18-P:99968..100011    | Tc00.1047053508851.110 | 384, 443 hypothetical protein, conserved         |
| TcChr18-P:144037..144080   | Tc00.1047053511231.40  | 188 hypothetical protein, conserved              |
| TcChr18-P:159832..159875   | Tc00.1047053511233.59  | 1597, 1814, 2368 hypothetical protein, conserved |
| TcChr18-P:163555..163598   | Tc00.1047053511233.70  | 16 hypothetical protein, conserved               |
| TcChr41-P:167789..167832   | Tc00.1047053509027.40  | 53 hypothetical protein, conserved               |
| TcChr41-P:218043..218086   | Tc00.1047053509029.60  | 290 hypothetical protein, conserved              |
| TcChr41-P:226734..226777   | Tc00.1047053509029.90  | 155 hypothetical protein, conserved              |
| TcChr41-P:471920..471963   | Tc00.1047053510219.10  | 30 hypothetical protein, conserved               |
| TcChr41-P:510858..510901   | Tc00.1047053503995.10  | 765 hypothetical protein, conserved              |
| TcChr41-P:961466..961509   | Tc00.1047053508873.420 | 193 hypothetical protein, conserved              |
| TcChr41-P:2217468..2217511 | Tc00.1047053510359.290 | 673 hypothetical protein, conserved              |
| TcChr41-P:2275479..2275522 | Tc00.1047053510359.10  | 474 hypothetical protein, conserved              |
| TcChr41-P:2318234..2318277 | Tc00.1047053510355.200 | 18 hypothetical protein, conserved               |
| TcChr33-S:93740..93783     | Tc00.1047053511585.90  | 430 hypothetical protein, conserved              |
| TcChr33-S:200822..200865   | Tc00.1047053511577.30  | 401 hypothetical protein, conserved              |

|                          |                        |                                              |
|--------------------------|------------------------|----------------------------------------------|
| TcChr33-S:589608..589651 | Tc00.1047053508347.40  | 661 hypothetical protein, conserved          |
| TcChr33-S:652003..652046 | Tc00.1047053504423.10  | 1125 hypothetical protein, conserved         |
| TcChr33-S:652439..652482 | Tc00.1047053504423.10  | 1561 hypothetical protein, conserved         |
| TcChr33-S:667430..667473 | Tc00.1047053506467.20  | 273 hypothetical protein, conserved          |
| TcChr33-S:833491..833534 | Tc00.1047053509979.140 | 82 hypothetical protein, conserved           |
| TcChr33-S:953955..953998 | Tc00.1047053510347.20  | 586 hypothetical protein, conserved          |
| TcChr29-S:445089..445132 | Tc00.1047053507747.260 | 427 hypothetical protein, conserved          |
| TcChr29-S:447640..447683 | Tc00.1047053506287.9   | 2437, 2488 hypothetical protein, conserved   |
| TcChr29-S:453145..453188 | Tc00.1047053506287.20  | 515 hypothetical protein, conserved          |
| TcChr29-S:455466..455509 | Tc00.1047053506287.30  | 168 hypothetical protein, conserved          |
| TcChr29-S:475251..475294 | Tc00.1047053506287.170 | 208 hypothetical protein, conserved          |
| TcChr29-S:489735..489778 | Tc00.1047053506289.40  | 1274 hypothetical protein, conserved         |
| TcChr29-S:492577..492620 | Tc00.1047053506289.50  | 525 hypothetical protein, conserved          |
| TcChr29-S:562329..562372 | Tc00.1047053509543.40  | 164 hypothetical protein, conserved          |
| TcChr29-S:572888..572931 | Tc00.1047053506135.30  | 322 hypothetical protein, conserved          |
| TcChr29-S:577912..577955 | Tc00.1047053506135.50  | 287 hypothetical protein, conserved          |
| TcChr29-S:585679..585722 | Tc00.1047053506135.90  | 258 hypothetical protein, conserved          |
| TcChr29-S:588007..588050 | Tc00.1047053506135.100 | 234 hypothetical protein, conserved          |
| TcChr29-S:676072..676115 | Tc00.1047053503899.40  | 406 hypothetical protein, conserved          |
| TcChr29-S:685538..685581 | Tc00.1047053503899.80  | 18, 157 hypothetical protein, conserved      |
| TcChr29-S:701365..701408 | Tc00.1047053508213.49  | 114 hypothetical protein, conserved          |
| TcChr29-S:710560..710603 | Tc00.1047053508211.70  | 9, 529 hypothetical protein, conserved       |
| TcChr29-S:719194..719237 | Tc00.1047053508211.50  | 107, 561 hypothetical protein, conserved     |
| TcChr29-S:723129..723172 | Tc00.1047053508211.40  | 461 hypothetical protein, conserved          |
| TcChr29-S:734122..734165 | Tc00.1047053508209.150 | 204 hypothetical protein, conserved          |
| TcChr29-S:735148..735191 | Tc00.1047053508209.144 | 40 hypothetical protein, conserved           |
| TcChr29-S:742857..742900 | Tc00.1047053508209.130 | 321 hypothetical protein, conserved          |
| TcChr29-S:749504..749547 | Tc00.1047053508209.80  | 77 hypothetical protein, conserved           |
| TcChr29-S:753854..753897 | Tc00.1047053508209.50  | 98 hypothetical protein, conserved           |
| TcChr29-S:761057..761100 | Tc00.1047053508209.20  | -13 hypothetical protein, conserved          |
| TcChr29-S:766630..766673 | Tc00.1047053503579.10  | 64 hypothetical protein, conserved           |
| TcChr29-S:811435..811478 | Tc00.1047053508207.220 | 134 hypothetical protein, conserved          |
| TcChr29-S:828577..828620 | Tc00.1047053508207.140 | 200 hypothetical protein, conserved          |
| TcChr29-S:831791..831834 | Tc00.1047053508207.120 | 40 hypothetical protein, conserved           |
| TcChr29-S:843373..843416 | Tc00.1047053508207.60  | 59, 352 hypothetical protein, conserved      |
| TcChr33-P:875201..875244 | Tc00.1047053508613.50  | 644 hypothetical protein, conserved          |
| TcChr24-S:166761..166804 | Tc00.1047053506953.20  | 2255 hypothetical protein, conserved         |
| TcChr24-S:277155..277198 | Tc00.1047053509127.70  | 437 hypothetical protein, conserved          |
| TcChr24-S:339898..339941 | Tc00.1047053408437.10  | 973 hypothetical protein, conserved          |
| TcChr24-S:340885..340928 | Tc00.1047053408437.20  | 571 hypothetical protein, conserved          |
| TcChr24-S:360752..360795 | Tc00.1047053511685.60  | 97, 724, 931 hypothetical protein, conserved |
| TcChr24-S:377502..377545 | Tc00.1047053509139.20  | 165 hypothetical protein, conserved          |
| TcChr24-S:382423..382466 | Tc00.1047053485889.10  | 608 hypothetical protein, conserved          |
| TcChr24-S:401185..401228 | Tc00.1047053511689.19  | 165 hypothetical protein, conserved          |
| TcChr24-S:432105..432148 | Tc00.1047053509145.10  | 160 hypothetical protein, conserved          |
| TcChr24-S:435720..435763 | Tc00.1047053450061.10  | 298 hypothetical protein, conserved          |
| TcChr20-P:91598..91641   | Tc00.1047053510967.20  | 10 hypothetical protein, conserved           |
| TcChr20-P:388837..388880 | Tc00.1047053511837.110 | 143 hypothetical protein, conserved          |
| TcChr16-P:423737..423780 | Tc00.1047053506807.20  | 2544 hypothetical protein, conserved         |
| TcChr21-P:128223..128266 | Tc00.1047053509109.30  | 69 hypothetical protein, conserved           |
| TcChr21-P:480404..480447 | Tc00.1047053507063.40  | 2661 hypothetical protein, conserved         |

|                            |                        |                                                                        |
|----------------------------|------------------------|------------------------------------------------------------------------|
| TcChr21-P:487821..487864   | Tc00.1047053507063.80  | 1049 hypothetical protein, conserved                                   |
| TcChr23-S:406889..406932   | Tc00.1047053506979.40  | 246 hypothetical protein, conserved                                    |
| TcChr40-S:97361..97404     | Tc00.1047053511353.60  | 280 hypothetical protein, conserved                                    |
| TcChr40-S:586487..586530   | Tc00.1047053506527.10  | 161 hypothetical protein, conserved                                    |
| TcChr40-S:675331..675374   | Tc00.1047053507993.200 | 162 hypothetical protein, conserved                                    |
| TcChr40-S:705380..705423   | Tc00.1047053507993.70  | 423 hypothetical protein, conserved                                    |
| TcChr40-S:1035078..1035121 | Tc00.1047053507831.30  | 3469 hypothetical protein, conserved                                   |
| TcChr40-S:1823983..1824026 | Tc00.1047053506543.100 | 1544 hypothetical protein, conserved                                   |
| TcChr38-S:52800..52843     | Tc00.1047053511469.50  | 187 hypothetical protein, conserved                                    |
| TcChr38-S:53942..53985     | Tc00.1047053511469.40  | 399 hypothetical protein, conserved                                    |
| TcChr38-S:56714..56757     | Tc00.1047053511469.20  | 219 hypothetical protein, conserved                                    |
| TcChr38-S:58506..58549     | Tc00.1047053511467.70  | 231 hypothetical protein, conserved                                    |
| TcChr38-S:59812..59855     | Tc00.1047053511467.60  | 107 hypothetical protein, conserved                                    |
| TcChr38-S:61009..61052     | Tc00.1047053511467.50  | 237 hypothetical protein, conserved                                    |
| TcChr38-S:68958..69001     | Tc00.1047053511467.30  | 944, 1866 hypothetical protein, conserved                              |
| TcChr38-S:79141..79184     | Tc00.1047053511467.16  | 133, 609 hypothetical protein, conserved                               |
| TcChr38-S:80631..80674     | Tc00.1047053511467.13  | 623 hypothetical protein, conserved                                    |
| TcChr38-S:84081..84124     | Tc00.1047053511467.4   | 484 hypothetical protein, conserved                                    |
| TcChr38-S:85104..85147     | Tc00.1047053503453.4   | 636 hypothetical protein, conserved                                    |
| TcChr38-S:103441..103484   | Tc00.1047053503453.90  | 249, 445 hypothetical protein, conserved                               |
| TcChr38-S:110330..110373   | Tc00.1047053510997.20  | 130, 315 hypothetical protein, conserved                               |
| TcChr38-S:122365..122408   | Tc00.1047053510999.10  | 822, 890, 1418, 1822 hypothetical protein, conserved                   |
| TcChr38-S:124735..124778   | Tc00.1047053510999.19  | 563 hypothetical protein, conserved                                    |
| TcChr38-S:131937..131980   | Tc00.1047053511001.30  | 201 hypothetical protein, conserved                                    |
| TcChr38-S:137488..137531   | Tc00.1047053511001.50  | 1026, 1101 hypothetical protein, conserved                             |
| TcChr38-S:148646..148689   | Tc00.1047053511001.80  | 2 hypothetical protein, conserved                                      |
| TcChr38-S:156247..156290   | Tc00.1047053511001.90  | 781 hypothetical protein, conserved                                    |
| TcChr38-S:159137..159180   | Tc00.1047053511001.110 | 141 hypothetical protein, conserved                                    |
| TcChr38-S:171395..171438   | Tc00.1047053511001.150 | 495 hypothetical protein, conserved                                    |
| TcChr38-S:188053..188096   | Tc00.1047053511001.170 | 741 hypothetical protein, conserved                                    |
| TcChr38-S:190663..190706   | Tc00.1047053511001.180 | 284, 406 hypothetical protein, conserved                               |
| TcChr38-S:195328..195371   | Tc00.1047053511001.210 | 112 hypothetical protein, conserved                                    |
| TcChr38-S:204641..204684   | Tc00.1047053503841.20  | 761 hypothetical protein, conserved                                    |
| TcChr38-S:209407..209450   | Tc00.1047053503841.50  | 99, 358, 559 hypothetical protein, conserved                           |
| TcChr38-S:221983..222026   | Tc00.1047053508535.20  | 130, 512 hypothetical protein, conserved                               |
| TcChr38-S:224359..224402   | Tc00.1047053508535.30  | 231 hypothetical protein, conserved                                    |
| TcChr38-S:224468..224511   | Tc00.1047053508535.30  | 340 hypothetical protein, conserved                                    |
| TcChr38-S:236078..236121   | Tc00.1047053508539.20  | 159 hypothetical protein, conserved                                    |
| TcChr38-S:240910..240953   | Tc00.1047053508539.40  | 716, 1439 hypothetical protein, conserved                              |
| TcChr38-S:324452..324495   | Tc00.1047053508541.160 | 60, 307, 531 hypothetical protein, conserved                           |
| TcChr38-S:326024..326067   | Tc00.1047053508541.170 | 315, 481 hypothetical protein, conserved                               |
| TcChr38-S:329429..329472   | Tc00.1047053508541.190 | 120, 163 hypothetical protein, conserved                               |
| TcChr38-S:329476..329540   | Tc00.1047053508541.190 | 167, 658, 801, 1437, 1664, 1710, 4021 hypothetical protein, conserved  |
| TcChr38-S:335355..335467   | Tc00.1047053508541.200 | 1766, 1878 hypothetical protein, conserved                             |
| TcChr38-S:335740..343724   | Tc00.1047053508541.210 | 50 hypothetical protein, conserved                                     |
| TcChr38-S:345712..346434   | Tc00.1047053504929.5   | 171, 893, 1018, 1440, 1946, 4103, 4135 hypothetical protein, conserved |
| TcChr38-S:359621..359751   | Tc00.1047053503599.40  | 868, 998, 1162 hypothetical protein, conserved                         |
| TcChr38-S:361833..364250   | Tc00.1047053503599.70  | -48 hypothetical protein, conserved                                    |
| TcChr38-S:370274..370810   | Tc00.1047053503467.20  | 2674 hypothetical protein, conserved                                   |
| TcChr38-S:1232890..1232996 | Tc00.1047053511179.130 | 199, 305, 1258 hypothetical protein, conserved                         |
| TcChr38-S:1270808..1272266 | Tc00.1047053511181.10  | 158, 1616 hypothetical protein, conserved                              |

|                            |                        |                                                              |
|----------------------------|------------------------|--------------------------------------------------------------|
| TcChr38-S:1272693..1274234 | Tc00.1047053511181.20  | -108 hypothetical protein, conserved                         |
| TcChr38-S:1274234..1274898 | Tc00.1047053511181.30  | 503, 1167 hypothetical protein, conserved                    |
| TcChr38-S:1281949..1282082 | Tc00.1047053511181.60  | 202, 335, 479, 1314 hypothetical protein, conserved          |
| TcChr38-S:1299480..1300620 | Tc00.1047053511181.110 | 1082, 1153, -58 hypothetical protein, conserved              |
| TcChr38-S:1307427..1308589 | Tc00.1047053511181.150 | 2130, 3292 hypothetical protein, conserved                   |
| TcChr38-S:1315381..1316839 | Tc00.1047053508805.20  | 1851 hypothetical protein, conserved                         |
| TcChr15-S:13244..13287     | Tc00.1047053506713.24  | 298 hypothetical protein, conserved                          |
| TcChr15-S:13864..13907     | Tc00.1047053506713.20  | 210 hypothetical protein, conserved                          |
| TcChr15-S:15600..15643     | Tc00.1047053506713.10  | 200 hypothetical protein, conserved                          |
| TcChr15-S:23105..23148     | Tc00.1047053509231.23  | 700 hypothetical protein, conserved                          |
| TcChr15-S:24384..24427     | Tc00.1047053509231.26  | 90, 329 hypothetical protein, conserved                      |
| TcChr15-S:28617..28660     | Tc00.1047053509231.39  | 58, 1068, 1360 hypothetical protein, conserved               |
| TcChr15-S:29140..29183     | Tc00.1047053509231.50  | 856 hypothetical protein, conserved                          |
| TcChr15-S:32587..32630     | Tc00.1047053511867.10  | 50, 389, 632, 807, 869, 1619 hypothetical protein, conserved |
| TcChr15-S:33982..34025     | Tc00.1047053511867.20  | 286 hypothetical protein, conserved                          |
| TcChr15-S:39899..39942     | Tc00.1047053511867.60  | 243 hypothetical protein, conserved                          |
| TcChr15-S:44643..44686     | Tc00.1047053511867.90  | 312 hypothetical protein, conserved                          |
| TcChr15-S:48570..48613     | Tc00.1047053511867.120 | 197, 1365 hypothetical protein, conserved                    |
| TcChr15-S:51415..51458     | Tc00.1047053511867.130 | 143 hypothetical protein, conserved                          |
| TcChr15-S:59088..59131     | Tc00.1047053511867.160 | 211 hypothetical protein, conserved                          |
| TcChr15-S:61463..61506     | Tc00.1047053511867.180 | 55, 235 hypothetical protein, conserved                      |
| TcChr15-S:68294..68337     | Tc00.1047053511867.200 | 373 hypothetical protein, conserved                          |
| TcChr15-S:76788..76831     | Tc00.1047053511871.10  | 190 hypothetical protein, conserved                          |
| TcChr15-S:81513..81556     | Tc00.1047053511871.30  | 1135 hypothetical protein, conserved                         |
| TcChr15-S:92537..92580     | Tc00.1047053511871.90  | 628, 696, 845 hypothetical protein, conserved                |
| TcChr15-S:97769..97812     | Tc00.1047053511871.110 | 563 hypothetical protein, conserved                          |
| TcChr15-S:271132..271175   | Tc00.1047053509233.60  | 295, 421 hypothetical protein, conserved                     |
| TcChr15-S:278813..278856   | Tc00.1047053509233.120 | 413, 552 hypothetical protein, conserved                     |
| TcChr15-S:293120..293163   | Tc00.1047053509233.160 | 538, 677 hypothetical protein, conserved                     |
| TcChr15-S:293567..293610   | Tc00.1047053509233.160 | 91 hypothetical protein, conserved                           |
| TcChr15-S:295088..295131   | Tc00.1047053509233.170 | 448 hypothetical protein, conserved                          |
| TcChr15-S:301915..301958   | Tc00.1047053509233.200 | 30, 231, 510 hypothetical protein, conserved                 |
| TcChr15-S:306686..306729   | Tc00.1047053509233.220 | 116 hypothetical protein, conserved                          |
| TcChr15-S:315534..315577   | Tc00.1047053509233.239 | 272, 400 hypothetical protein, conserved                     |
| TcChr15-S:320056..320099   | Tc00.1047053509451.50  | 131, 224 hypothetical protein, conserved                     |
| TcChr15-S:329971..330014   | Tc00.1047053503813.10  | 240, 331, 1052, 1185, 1544 hypothetical protein, conserved   |
| TcChr15-S:331634..331677   | Tc00.1047053503813.20  | 509 hypothetical protein, conserved                          |
| TcChr15-S:335436..335479   | Tc00.1047053503813.30  | 427, 923 hypothetical protein, conserved                     |
| TcChr15-S:351312..351355   | Tc00.1047053509453.79  | 240 hypothetical protein, conserved                          |
| TcChr15-S:366384..366427   | Tc00.1047053509455.20  | 547, 672 hypothetical protein, conserved                     |
| TcChr15-S:369900..369943   | Tc00.1047053509455.30  | 115 hypothetical protein, conserved                          |
| TcChr15-S:372596..372639   | Tc00.1047053509455.50  | 82, 281 hypothetical protein, conserved                      |
| TcChr15-S:373775..373818   | Tc00.1047053509455.60  | 147, 338 hypothetical protein, conserved                     |
| TcChr15-S:380431..380474   | Tc00.1047053509455.90  | 546, 1076 hypothetical protein, conserved                    |
| TcChr15-S:384402..384445   | Tc00.1047053509455.110 | 303 hypothetical protein, conserved                          |
| TcChr15-S:385935..385978   | Tc00.1047053509455.114 | 1124, 1318 hypothetical protein, conserved                   |
| TcChr15-S:389802..389845   | Tc00.1047053509455.130 | 155 hypothetical protein, conserved                          |
| TcChr13-S:192571..192614   | Tc00.1047053506859.80  | 1211 hypothetical protein, conserved                         |
| TcChr13-S:220928..220971   | Tc00.1047053506859.204 | 1819 hypothetical protein, conserved                         |
| TcChr13-S:234469..234512   | Tc00.1047053506859.240 | 1414, 1790 hypothetical protein, conserved                   |
| TcChr13-S:300397..300440   | Tc00.1047053510531.40  | 439 hypothetical protein, conserved                          |

|                            |                        |                                         |
|----------------------------|------------------------|-----------------------------------------|
| TcChr22-S:261838..261881   | Tc00.1047053504425.70  | 110 hypothetical protein, conserved     |
| TcChr22-S:525163..525206   | Tc00.1047053510515.70  | 507 hypothetical protein, conserved     |
| TcChr22-S:596783..596826   | Tc00.1047053509769.100 | 119 hypothetical protein, conserved     |
| TcChr22-S:600083..600126   | Tc00.1047053509769.80  | 470 hypothetical protein, conserved     |
| TcChr22-S:606091..606134   | Tc00.1047053509769.60  | 82 hypothetical protein, conserved      |
| TcChr34-P:167844..167887   | Tc00.1047053507053.140 | 272 hypothetical protein, conserved     |
| TcChr34-P:171941..171984   | Tc00.1047053507053.110 | 322 hypothetical protein, conserved     |
| TcChr34-P:338792..338835   | Tc00.1047053508693.40  | 202 hypothetical protein, conserved     |
| TcChr34-P:486553..486596   | Tc00.1047053503923.30  | 320 hypothetical protein, conserved     |
| TcChr34-P:546106..546149   | Tc00.1047053506559.550 | 392 hypothetical protein, conserved     |
| TcChr34-P:586349..586392   | Tc00.1047053506559.440 | 195 hypothetical protein, conserved     |
| TcChr28-S:64379..64422     | Tc00.1047053510609.90  | 210 hypothetical protein, conserved     |
| TcChr28-S:67139..67182     | Tc00.1047053510609.100 | 377 hypothetical protein, conserved     |
| TcChr28-S:75021..75064     | Tc00.1047053510609.120 | 157 hypothetical protein, conserved     |
| TcChr28-S:99691..99734     | Tc00.1047053510611.70  | 445 hypothetical protein, conserved     |
| TcChr28-S:101659..101702   | Tc00.1047053508383.10  | 62 hypothetical protein, conserved      |
| TcChr28-S:117262..117305   | Tc00.1047053508385.20  | 66, 792 hypothetical protein, conserved |
| TcChr28-S:134032..134075   | Tc00.1047053510613.10  | 103 hypothetical protein, conserved     |
| TcChr28-S:145795..145838   | Tc00.1047053510615.4   | 62 hypothetical protein, conserved      |
| TcChr28-S:148843..148886   | Tc00.1047053510615.10  | 546 hypothetical protein, conserved     |
| TcChr28-S:161202..161245   | Tc00.1047053508387.30  | 1128 hypothetical protein, conserved    |
| TcChr28-S:175489..175532   | Tc00.1047053508387.80  | -10 hypothetical protein, conserved     |
| TcChr28-S:203825..203868   | Tc00.1047053508389.10  | 783 hypothetical protein, conserved     |
| TcChr28-S:657589..657632   | Tc00.1047053509885.40  | 323 hypothetical protein, conserved     |
| TcChr28-S:664122..664165   | Tc00.1047053509885.64  | 538 hypothetical protein, conserved     |
| TcChr5-S:11477..11520      | Tc00.1047053510249.30  | 871 hypothetical protein, conserved     |
| TcChr5-S:171656..171699    | Tc00.1047053508955.20  | 798 hypothetical protein, conserved     |
| TcChr5-S:174440..174483    | Tc00.1047053506495.6   | 54 hypothetical protein, conserved      |
| TcChr30-S:187113..187156   | Tc00.1047053506165.4   | 840 hypothetical protein, conserved     |
| TcChr30-S:249695..249738   | Tc00.1047053504041.10  | 279 hypothetical protein, conserved     |
| TcChr30-S:285074..285117   | Tc00.1047053504073.20  | 568 hypothetical protein, conserved     |
| TcChr30-S:312706..312749   | Tc00.1047053503753.10  | 285 hypothetical protein, conserved     |
| TcChr30-S:350826..350869   | Tc00.1047053511201.49  | 16 hypothetical protein, conserved      |
| TcChr30-S:465592..465635   | Tc00.1047053507077.50  | 92 hypothetical protein, conserved      |
| TcChr30-S:489155..489198   | Tc00.1047053511801.30  | 0 hypothetical protein, conserved       |
| TcChr30-S:709355..709398   | Tc00.1047053506937.20  | 112 hypothetical protein, conserved     |
| TcChr30-S:723632..723675   | Tc00.1047053508831.10  | 312 hypothetical protein, conserved     |
| TcChr40-P:93363..93406     | Tc00.1047053511301.44  | 642 hypothetical protein, conserved     |
| TcChr40-P:230351..230394   | Tc00.1047053511295.20  | 1009 hypothetical protein, conserved    |
| TcChr40-P:272585..272628   | Tc00.1047053504161.30  | 321 hypothetical protein, conserved     |
| TcChr40-P:385473..385516   | Tc00.1047053511291.50  | 974 hypothetical protein, conserved     |
| TcChr40-P:587839..587882   | Tc00.1047053511283.170 | 157 hypothetical protein, conserved     |
| TcChr40-P:652940..652983   | Tc00.1047053511281.10  | 316 hypothetical protein, conserved     |
| TcChr40-P:707778..707821   | Tc00.1047053511277.510 | 411 hypothetical protein, conserved     |
| TcChr40-P:711944..711987   | Tc00.1047053511277.490 | 2398 hypothetical protein, conserved    |
| TcChr40-P:747144..747187   | Tc00.1047053511277.310 | 105 hypothetical protein, conserved     |
| TcChr40-P:992375..1010201  | Tc00.1047053503939.50  | 562 hypothetical protein, conserved     |
| TcChr40-P:1010201..1037935 | Tc00.1047053511267.24  | 229 hypothetical protein, conserved     |
| TcChr40-P:1037935..1730916 | Tc00.1047053511263.30  | 647 hypothetical protein, conserved     |
| TcChr40-P:1730916..1809494 | Tc00.1047053425855.9   | 1456 hypothetical protein, conserved    |
| TcChr40-P:1809494..1854270 | Tc00.1047053504045.100 | 691 hypothetical protein, conserved     |



|                            |                        |                                                            |
|----------------------------|------------------------|------------------------------------------------------------|
| TcChr40-P:1854270..1882082 | Tc00.1047053507081.130 | 602 hypothetical protein, conserved                        |
| TcChr40-P:1882082..1934387 | Tc00.1047053508479.350 | 689 hypothetical protein, conserved                        |
| TcChr17-S:191914..191957   | Tc00.1047053511303.9   | 1605 hypothetical protein, conserved                       |
| TcChr17-S:226681..226724   | Tc00.1047053511303.120 | 271 hypothetical protein, conserved                        |
| TcChr17-S:265005..265048   | Tc00.1047053511307.6   | 11 hypothetical protein, conserved                         |
| TcChr17-S:594990..595033   | Tc00.1047053506513.90  | 42 hypothetical protein, conserved                         |
| TcChr17-S:612374..612417   | Tc00.1047053506513.7   | 2028 hypothetical protein, conserved                       |
| TcChr34-S:94825..94868     | Tc00.1047053507873.50  | 195 hypothetical protein, conserved                        |
| TcChr34-S:397949..397992   | Tc00.1047053504057.21  | 1235 hypothetical protein, conserved                       |
| TcChr34-S:407218..407261   | Tc00.1047053504057.40  | 84, 1467, 2624 hypothetical protein, conserved             |
| TcChr34-S:486583..486626   | Tc00.1047053508583.10  | 339 hypothetical protein, conserved                        |
| TcChr34-S:493408..493451   | Tc00.1047053510877.190 | 80, 2177 hypothetical protein, conserved                   |
| TcChr34-S:496982..497025   | Tc00.1047053510877.170 | 659 hypothetical protein, conserved                        |
| TcChr34-S:509034..509077   | Tc00.1047053510877.110 | 142 hypothetical protein, conserved                        |
| TcChr34-S:638118..638161   | Tc00.1047053510227.10  | 1133 hypothetical protein, conserved                       |
| TcChr34-S:752628..752671   | Tc00.1047053506635.130 | 502, 556 hypothetical protein, conserved                   |
| TcChr34-S:827621..827664   | Tc00.1047053456139.10  | 1054 hypothetical protein, conserved                       |
| TcChr34-S:850120..850163   | Tc00.1047053506265.60  | 387 hypothetical protein, conserved                        |
| TcChr34-S:853277..853320   | Tc00.1047053506265.70  | 752 hypothetical protein, conserved                        |
| TcChr34-S:855829..855872   | Tc00.1047053506265.90  | 185 hypothetical protein, conserved                        |
| TcChr34-S:957169..957212   | Tc00.1047053507485.100 | 1089 hypothetical protein, conserved                       |
| TcChr34-S:966494..966537   | Tc00.1047053507485.50  | 1155 hypothetical protein, conserved                       |
| TcChr39-P:18754..18797     | Tc00.1047053504109.120 | 118 hypothetical protein, conserved                        |
| TcChr39-P:460807..460850   | Tc00.1047053472833.10  | 102 hypothetical protein, conserved                        |
| TcChr39-P:769934..769977   | Tc00.1047053506303.90  | 225 hypothetical protein, conserved                        |
| TcChr39-P:791281..791324   | Tc00.1047053506305.10  | 1112 hypothetical protein, conserved                       |
| TcChr39-P:798372..798415   | Tc00.1047053506305.29  | 403 hypothetical protein, conserved                        |
| TcChr39-P:907489..907532   | Tc00.1047053506883.120 | 100 hypothetical protein, conserved                        |
| TcChr39-P:962319..962362   | Tc00.1047053510729.210 | 2876 hypothetical protein, conserved                       |
| TcChr39-P:994160..994203   | Tc00.1047053510729.60  | 897 hypothetical protein, conserved                        |
| TcChr39-P:1103622..1103665 | Tc00.1047053507007.20  | 85 hypothetical protein, conserved                         |
| TcChr39-P:1123015..1123058 | Tc00.1047053507007.77  | 730, 2799 hypothetical protein, conserved                  |
| TcChr39-P:1136729..1136772 | Tc00.1047053510733.30  | 274 hypothetical protein, conserved                        |
| TcChr39-P:1230551..1230594 | Tc00.1047053508461.234 | 120 hypothetical protein, conserved                        |
| TcChr39-P:1381285..1381328 | Tc00.1047053507003.60  | 200 hypothetical protein, conserved                        |
| TcChr39-P:1694613..1694656 | Tc00.1047053506999.100 | 369 hypothetical protein, conserved                        |
| TcChr19-P:156820..156863   | Tc00.1047053509609.10  | 218 hypothetical protein, conserved                        |
| TcChr19-P:183453..183496   | Tc00.1047053507649.20  | 493 hypothetical protein, conserved                        |
| TcChr19-P:247425..247468   | Tc00.1047053509607.20  | 795, 948, 2048, 2223, 7353 hypothetical protein, conserved |
| TcChr19-P:256823..256866   | Tc00.1047053503733.80  | 817, 1347 hypothetical protein, conserved                  |
| TcChr19-P:309814..309857   | Tc00.1047053503727.20  | 342 hypothetical protein, conserved                        |
| TcChr19-P:367255..367298   | Tc00.1047053510835.10  | 13, 2378 hypothetical protein, conserved                   |
| TcChr19-P:460717..460760   | Tc00.1047053508547.190 | 723 hypothetical protein, conserved                        |
| TcChr19-P:513102..513145   | Tc00.1047053503565.29  | 1542 hypothetical protein, conserved                       |
| TcChr25-S:117595..117638   | Tc00.1047053511215.14  | 253 hypothetical protein, conserved                        |
| TcChr25-S:139662..139705   | Tc00.1047053511215.90  | 678 hypothetical protein, conserved                        |
| TcChr25-S:152809..152852   | Tc00.1047053434931.20  | 1424 hypothetical protein, conserved                       |
| TcChr25-S:158251..158294   | Tc00.1047053508839.40  | 384 hypothetical protein, conserved                        |
| TcChr25-S:185596..185639   | Tc00.1047053506949.20  | 475 hypothetical protein, conserved                        |
| TcChr25-S:208452..208495   | Tc00.1047053511217.50  | 209 hypothetical protein, conserved                        |
| TcChr25-S:215716..215759   | Tc00.1047053511217.80  | 285 hypothetical protein, conserved                        |

|                          |                        |                                          |
|--------------------------|------------------------|------------------------------------------|
| TcChr25-S:221738..221781 | Tc00.1047053511217.90  | 605 hypothetical protein, conserved      |
| TcChr25-S:225820..225863 | Tc00.1047053511217.100 | 82 hypothetical protein, conserved       |
| TcChr25-S:245526..245569 | Tc00.1047053511217.170 | 680 hypothetical protein, conserved      |
| TcChr25-S:268444..268487 | Tc00.1047053507275.20  | 754 hypothetical protein, conserved      |
| TcChr25-S:314924..314967 | Tc00.1047053506749.10  | 1991 hypothetical protein, conserved     |
| TcChr25-S:333476..333519 | Tc00.1047053507083.40  | 413 hypothetical protein, conserved      |
| TcChr25-S:341245..341288 | Tc00.1047053507083.90  | 352 hypothetical protein, conserved      |
| TcChr25-S:359348..359391 | Tc00.1047053507083.109 | 131 hypothetical protein, conserved      |
| TcChr25-S:363341..363384 | Tc00.1047053503477.10  | 604 hypothetical protein, conserved      |
| TcChr25-S:472512..472555 | Tc00.1047053507091.20  | 316 hypothetical protein, conserved      |
| TcChr25-S:480148..480191 | Tc00.1047053506745.10  | 504 hypothetical protein, conserved      |
| TcChr25-S:652967..653010 | Tc00.1047053506743.60  | 78, 343 hypothetical protein, conserved  |
| TcChr3-S:56964..57007    | Tc00.1047053506739.140 | 301 hypothetical protein, conserved      |
| TcChr22-P:513627..513670 | Tc00.1047053509857.60  | 3780 hypothetical protein, conserved     |
| TcChr32-S:123651..123694 | Tc00.1047053505807.140 | 51 hypothetical protein, conserved       |
| TcChr32-S:200425..200468 | Tc00.1047053504935.20  | 51 hypothetical protein, conserved       |
| TcChr32-S:306284..306327 | Tc00.1047053509965.429 | 1030 hypothetical protein, conserved     |
| TcChr32-S:332087..332130 | Tc00.1047053509965.319 | 109 hypothetical protein, conserved      |
| TcChr32-S:351937..351980 | Tc00.1047053509965.200 | 64 hypothetical protein, conserved       |
| TcChr32-S:427973..428016 | Tc00.1047053511753.90  | 237 hypothetical protein, conserved      |
| TcChr32-S:454287..454330 | Tc00.1047053511751.220 | 340 hypothetical protein, conserved      |
| TcChr32-S:472748..472791 | Tc00.1047053511751.160 | 408 hypothetical protein, conserved      |
| TcChr32-S:627981..628024 | Tc00.1047053506941.50  | 605 hypothetical protein, conserved      |
| TcChr32-S:746212..746255 | Tc00.1047053511737.6   | 29 hypothetical protein, conserved       |
| TcChr32-S:808568..808611 | Tc00.1047053509167.200 | 340 hypothetical protein, conserved      |
| TcChr32-S:827083..827126 | Tc00.1047053509167.140 | 419, 967 hypothetical protein, conserved |
| TcChr32-S:854368..854411 | Tc00.1047053511731.89  | 1733 hypothetical protein, conserved     |
| TcChr32-S:902705..902748 | Tc00.1047053506945.50  | 355 hypothetical protein, conserved      |
| TcChr32-S:932431..932474 | Tc00.1047053506945.250 | 311 hypothetical protein, conserved      |
| TcChr9-P:342577..342620  | Tc00.1047053506475.105 | 776 hypothetical protein, conserved      |
| TcChr11-P:142702..142745 | Tc00.1047053508857.130 | 384 hypothetical protein, conserved      |
| TcChr11-P:183921..183964 | Tc00.1047053511239.60  | 230 hypothetical protein, conserved      |
| TcChr11-P:451670..451713 | Tc00.1047053509937.160 | 557 hypothetical protein, conserved      |
| TcChr7-P:143953..143996  | Tc00.1047053503543.20  | 32 hypothetical protein, conserved       |
| TcChr7-P:175248..175291  | Tc00.1047053509945.20  | 49 hypothetical protein, conserved       |
| TcChr7-P:200041..200084  | Tc00.1047053506445.20  | 1124 hypothetical protein, conserved     |
| TcChr35-S:107288..107331 | Tc00.1047053398751.10  | 729 hypothetical protein, conserved      |
| TcChr35-S:218232..218275 | Tc00.1047053507089.170 | 285 hypothetical protein, conserved      |
| TcChr35-S:248541..248584 | Tc00.1047053511531.30  | 1374 hypothetical protein, conserved     |
| TcChr35-S:407923..407966 | Tc00.1047053511543.10  | 306 hypothetical protein, conserved      |
| TcChr35-S:515932..515975 | Tc00.1047053511545.130 | 437 hypothetical protein, conserved      |
| TcChr35-S:522427..522470 | Tc00.1047053511545.170 | 336 hypothetical protein, conserved      |
| TcChr35-S:524585..524628 | Tc00.1047053511545.180 | 120 hypothetical protein, conserved      |
| TcChr35-S:542344..542387 | Tc00.1047053507041.40  | 105 hypothetical protein, conserved      |
| TcChr35-S:617075..617118 | Tc00.1047053507129.5   | 780 hypothetical protein, conserved      |
| TcChr35-S:732967..733010 | Tc00.1047053509157.90  | 672 hypothetical protein, conserved      |
| TcChr35-S:778175..778218 | Tc00.1047053511715.40  | 134 hypothetical protein, conserved      |
| TcChr19-S:243794..243837 | Tc00.1047053508569.10  | 7492 hypothetical protein, conserved     |
| TcChr37-S:85623..85666   | Tc00.1047053507611.270 | 386 hypothetical protein, conserved      |
| TcChr37-S:428923..428966 | Tc00.1047053503525.4   | 694 hypothetical protein, conserved      |
| TcChr37-S:463935..463978 | Tc00.1047053504137.160 | 644 hypothetical protein, conserved      |

|                            |                        |                                                       |
|----------------------------|------------------------|-------------------------------------------------------|
| TcChr37-S:938877..938920   | Tc00.1047053507677.140 | 1622 hypothetical protein, conserved                  |
| TcChr37-S:938957..939000   | Tc00.1047053507677.140 | 1702 hypothetical protein, conserved                  |
| TcChr37-S:1272104..1272147 | Tc00.1047053503747.40  | 884 hypothetical protein, conserved                   |
| TcChr37-S:1272321..1272364 | Tc00.1047053503747.40  | 1101 hypothetical protein, conserved                  |
| TcChr26-P:246046..246089   | Tc00.1047053511907.290 | 305 hypothetical protein, conserved                   |
| TcChr26-P:287066..287109   | Tc00.1047053509243.20  | 3651 hypothetical protein, conserved                  |
| TcChr26-P:600931..600974   | Tc00.1047053503693.20  | 688 hypothetical protein, conserved                   |
| TcChr21-S:261672..261715   | Tc00.1047053404843.10  | 318 hypothetical protein, conserved                   |
| TcChr36-S:119067..119110   | Tc00.1047053508075.60  | 239 hypothetical protein, conserved                   |
| TcChr36-S:414481..414524   | Tc00.1047053509669.90  | 545 hypothetical protein, conserved                   |
| TcChr36-S:618719..618762   | Tc00.1047053508183.20  | 174 hypothetical protein, conserved                   |
| TcChr36-S:709150..709193   | Tc00.1047053506695.20  | 44 hypothetical protein, conserved                    |
| TcChr36-S:713537..713580   | Tc00.1047053510315.40  | 289 hypothetical protein, conserved                   |
| TcChr36-S:871457..871500   | Tc00.1047053510311.10  | 544 hypothetical protein, conserved                   |
| TcChr36-S:881529..881572   | Tc00.1047053510309.60  | 65 hypothetical protein, conserved                    |
| TcChr36-S:1023083..1023126 | Tc00.1047053503697.130 | 472 hypothetical protein, conserved                   |
| TcChr36-S:1106468..1106511 | Tc00.1047053506407.60  | 1266 hypothetical protein, conserved                  |
| TcChr30-P:34763..34806     | Tc00.1047053508577.60  | 1021 hypothetical protein, conserved                  |
| TcChr31-P:535472..535515   | Tc00.1047053511389.70  | 901 hypothetical protein, conserved                   |
| TcChr31-P:582326..582369   | Tc00.1047053508965.70  | 5384 hypothetical protein, conserved                  |
| TcChr2-P:62635..62678      | Tc00.1047053506123.70  | 770 hypothetical protein, conserved                   |
| TcChr37-P:385058..385101   | Tc00.1047053509793.50  | 973 hypothetical protein, conserved                   |
| TcChr25-P:82479..82522     | Tc00.1047053511383.80  | 250 hypothetical protein, conserved                   |
| TcChr25-P:247057..247100   | Tc00.1047053506573.40  | -4 hypothetical protein, conserved                    |
| TcChr31-S:177739..177782   | Tc00.1047053510595.58  | 220 hypothetical protein, conserved                   |
| TcChr31-S:562247..562290   | Tc00.1047053407477.69  | 35921 hypothetical protein, conserved                 |
| TcChr31-S:563545..563588   | Tc00.1047053407477.69  | 37219 hypothetical protein, conserved                 |
| TcChr31-S:751175..751218   | Tc00.1047053509895.60  | 196 hypothetical protein, conserved                   |
| TcChr7-S:199727..199770    | Tc00.1047053508277.340 | 1350 hypothetical protein, conserved                  |
| TcChr13-P:123031..123074   | Tc00.1047053511809.90  | 437 hypothetical protein, conserved                   |
| TcChr17-P:191860..191903   | Tc00.1047053509179.60  | 1302 hypothetical protein, conserved                  |
| TcChr6-P:26408..26451      | Tc00.1047053508593.100 | 386 hypothetical protein, conserved                   |
| TcChr14-P:266551..266594   | Tc00.1047053509229.20  | 1174 hypothetical protein, conserved                  |
| TcChr14-P:371987..372030   | Tc00.1047053509681.10  | 3834 hypothetical protein, conserved                  |
| TcChr9-S:257094..257137    | Tc00.1047053511427.10  | 605 hypothetical protein, conserved                   |
| TcChr39-S:1002002..1002045 | Tc00.1047053506885.354 | 378 hypothetical protein, conserved                   |
| TcChr35-P:208111..208154   | Tc00.1047053506725.40  | 422 hypothetical protein, conserved                   |
| TcChr35-P:218560..218603   | Tc00.1047053506725.20  | 313 hypothetical protein, conserved                   |
| TcChr35-P:515775..515818   | Tc00.1047053506819.40  | 450 hypothetical protein, conserved                   |
| TcChr41-P:2255474..2255517 | Tc00.1047053510359.120 | 434 hypothetical protein, conserved (pseudogene)      |
| TcChr29-S:792072..792115   | Tc00.1047053503901.9   | 22 hypothetical protein, conserved (pseudogene)       |
| TcChr24-S:18064..18107     | Tc00.1047053509921.51  | 417 hypothetical protein, conserved (pseudogene)      |
| TcChr24-S:396535..396578   | Tc00.1047053504225.20  | 470 hypothetical protein, conserved (pseudogene)      |
| TcChr38-S:1066477..1085794 | Tc00.1047053511171.25  | 582 hypothetical protein, conserved (pseudogene)      |
| TcChr15-S:86242..86285     | Tc00.1047053511871.60  | 377, 523 hypothetical protein, conserved (pseudogene) |
| TcChr15-S:127614..127657   | Tc00.1047053511873.41  | 2504 hypothetical protein, conserved (pseudogene)     |
| TcChr34-P:849841..849884   | Tc00.1047053506435.70  | 388 hypothetical protein, conserved (pseudogene)      |
| TcChr40-P:2007559..2024183 | Tc00.1047053508479.20  | 2528 hypothetical protein, conserved (pseudogene)     |
| TcChr39-P:1361871..1361914 | Tc00.1047053510665.60  | 132 hypothetical protein, conserved (pseudogene)      |
| TcChr35-S:798049..798092   | Tc00.1047053503989.30  | 397 hypothetical protein, conserved (pseudogene)      |
| TcChr24-S:384711..384754   | Tc00.1047053441401.10  | 369 imidazolonepropionase, putative                   |

|                            |                        |                                                                                   |
|----------------------------|------------------------|-----------------------------------------------------------------------------------|
| TcChr32-S:370095..370138   | Tc00.1047053509965.110 | 52 importin alpha, putative                                                       |
| TcChr36-S:651110..651153   | Tc00.1047053506699.40  | 54 katanin-like protein, putative,serine peptidase, Clan SJ, family S16, putative |
| TcChr30-P:818395..818438   | Tc00.1047053511665.130 | 130 kinase, putative                                                              |
| TcChr17-S:269082..269125   | Tc00.1047053511307.10  | 354 kinesin, putative                                                             |
| TcChr25-S:137746..137789   | Tc00.1047053511215.70  | 1592 kinesin, putative                                                            |
| TcChr35-S:151057..151100   | Tc00.1047053511529.80  | 983 kinetoplast DNA-associated protein, putative                                  |
| TcChr37-S:382264..382307   | Tc00.1047053508719.40  | 437 kinetoplast DNA-associated protein, putative                                  |
| TcChr41-S:224157..224200   | Tc00.1047053508777.40  | 136 leucine-rich repeat protein, putative                                         |
| TcChr32-S:125083..125126   | Tc00.1047053505807.150 | 56 leucine-rich repeat protein, putative                                          |
| TcChr32-P:125072..125115   | Tc00.1047053507017.20  | 55 leucine-rich repeat protein, putative                                          |
| TcChr34-S:429310..429353   | Tc00.1047053504057.120 | 580 lipophosphoglycan biosynthetic protein 2, putative                            |
| TcChr19-P:479637..479680   | Tc00.1047053508971.30  | 287 lysyl-tRNA synthetase, putative                                               |
| TcChr24-S:258897..258940   | Tc00.1047053509125.10  | 1921 mannosyltransferase-like protein, putative                                   |
| TcChr4-S:140286..140329    | Tc00.1047053510105.250 | 16 membrane-bound acid phosphatase 2, putative                                    |
| TcChr28-S:157861..157904   | Tc00.1047053508387.20  | 361 methylthioadenosine phosphorylase, putative                                   |
| TcChr12-P:144619..144662   | Tc00.1047053506229.10  | 1076 mitogen-activated protein kinase, putative                                   |
| TcChr29-S:805485..805528   | Tc00.1047053508207.250 | 766 mitotic cyclin, putative                                                      |
| TcChr35-S:568766..568809   | Tc00.1047053510939.25  | 887 mucin TcMUCI, putative                                                        |
| TcChr37-S:201743..201786   | Tc00.1047053504167.20  | 268 mucin TcMUCI, putative                                                        |
| TcChr38-S:406611..409527   | Tc00.1047053510209.18  | -101 mucin TcMUCII (pseudogene), putative                                         |
| TcChr38-S:439457..442930   | Tc00.1047053510207.35  | -97 mucin TcMUCII (pseudogene), putative                                          |
| TcChr38-S:471592..471613   | Tc00.1047053510205.15  | 147 mucin TcMUCII (pseudogene), putative                                          |
| TcChr38-S:471613..477893   | Tc00.1047053508121.155 | 301 mucin TcMUCII (pseudogene), putative                                          |
| TcChr38-S:485720..489267   | Tc00.1047053508121.101 | 312 mucin TcMUCII (pseudogene), putative                                          |
| TcChr18-P:251003..251046   | Tc00.1047053510239.60  | 265 mucin TcMUCII, putative                                                       |
| TcChr18-P:399729..399772   | Tc00.1047053506139.4   | 264 mucin TcMUCII, putative                                                       |
| TcChr38-S:265176..265219   | Tc00.1047053508539.155 | 169 mucin TcMUCII, putative                                                       |
| TcChr38-S:385038..385082   | Tc00.1047053510213.80  | 240, 284 mucin TcMUCII, putative                                                  |
| TcChr38-S:414421..415725   | Tc00.1047053508125.130 | 1028 mucin TcMUCII, putative                                                      |
| TcChr38-S:425328..425349   | Tc00.1047053508125.100 | 2053 mucin TcMUCII, putative                                                      |
| TcChr38-S:483532..485720   | Tc00.1047053508121.120 | 959 mucin TcMUCII, putative                                                       |
| TcChr28-S:224354..224397   | Tc00.1047053508389.114 | 220 mucin TcMUCII, putative                                                       |
| TcChr28-S:422540..422583   | Tc00.1047053506971.70  | 217 mucin TcMUCII, putative                                                       |
| TcChr24-P:583368..583411   | Tc00.1047053506917.60  | 215 mucin TcMUCII, putative                                                       |
| TcChr37-P:192441..192484   | Tc00.1047053508235.20  | 81 mucin TcMUCIII, putative                                                       |
| TcChr18-P:228347..228390   | Tc00.1047053510237.120 | 305 mucin-associated surface protein (MASP), putative                             |
| TcChr18-P:317210..317253   | Tc00.1047053508247.130 | 307 mucin-associated surface protein (MASP), putative                             |
| TcChr41-P:805196..805239   | Tc00.1047053503973.50  | 90 mucin-associated surface protein (MASP), putative                              |
| TcChr41-P:871818..871861   | Tc00.1047053508873.30  | 355 mucin-associated surface protein (MASP), putative                             |
| TcChr41-P:987545..987588   | Tc00.1047053508873.510 | 82 mucin-associated surface protein (MASP), putative                              |
| TcChr41-P:1002645..1002688 | Tc00.1047053508873.580 | 354 mucin-associated surface protein (MASP), putative                             |
| TcChr41-P:1029129..1029172 | Tc00.1047053511255.50  | 3766 mucin-associated surface protein (MASP), putative                            |
| TcChr41-P:1754301..1754344 | Tc00.1047053504081.40  | 309 mucin-associated surface protein (MASP), putative                             |
| TcChr41-P:1782280..1782323 | Tc00.1047053508221.960 | 350 mucin-associated surface protein (MASP), putative                             |
| TcChr41-P:1809275..1809318 | Tc00.1047053508221.820 | 77 mucin-associated surface protein (MASP), putative                              |
| TcChr41-P:1869915..1869958 | Tc00.1047053508221.580 | 307 mucin-associated surface protein (MASP), putative                             |
| TcChr41-P:1911317..1911360 | Tc00.1047053508221.420 | 378 mucin-associated surface protein (MASP), putative                             |
| TcChr41-P:1958317..1958360 | Tc00.1047053508221.210 | 348 mucin-associated surface protein (MASP), putative                             |
| TcChr41-P:1982447..1982490 | Tc00.1047053508221.104 | 4503 mucin-associated surface protein (MASP), putative                            |
| TcChr41-P:2003884..2003927 | Tc00.1047053510361.260 | 361 mucin-associated surface protein (MASP), putative                             |
| TcChr41-P:2132794..2132837 | Tc00.1047053510359.690 | 335 mucin-associated surface protein (MASP), putative                             |

|                            |                        |                                                                          |
|----------------------------|------------------------|--------------------------------------------------------------------------|
| TcChr41-P:2186937..2186980 | Tc00.1047053510359.460 | 310 mucin-associated surface protein (MASP), putative                    |
| TcChr18-S:395454..395497   | Tc00.1047053506965.20  | 331 mucin-associated surface protein (MASP), putative                    |
| TcChr18-S:408508..408551   | Tc00.1047053506965.100 | 316 mucin-associated surface protein (MASP), putative                    |
| TcChr18-S:498260..498303   | Tc00.1047053511609.30  | 314 mucin-associated surface protein (MASP), putative                    |
| TcChr18-S:510872..510915   | Tc00.1047053511611.20  | 314 mucin-associated surface protein (MASP), putative                    |
| TcChr18-S:603842..603885   | Tc00.1047053507237.100 | 319 mucin-associated surface protein (MASP), putative                    |
| TcChr18-S:612720..612763   | Tc00.1047053507237.170 | 311 mucin-associated surface protein (MASP), putative                    |
| TcChr41-S:432166..432209   | Tc00.1047053511553.200 | 84 mucin-associated surface protein (MASP), putative                     |
| TcChr41-S:633910..633953   | Tc00.1047053504039.180 | 353 mucin-associated surface protein (MASP), putative                    |
| TcChr41-S:741110..741153   | Tc00.1047053506599.150 | 363 mucin-associated surface protein (MASP), putative                    |
| TcChr41-S:1221781..1221824 | Tc00.1047053507957.320 | 357 mucin-associated surface protein (MASP), putative                    |
| TcChr41-S:1903920..1903963 | Tc00.1047053506763.30  | 346 mucin-associated surface protein (MASP), putative                    |
| TcChr41-S:1999211..1999254 | Tc00.1047053510371.10  | 353 mucin-associated surface protein (MASP), putative                    |
| TcChr38-P:1155848..1155891 | Tc00.1047053510483.230 | 81 mucin-associated surface protein (MASP), putative                     |
| TcChr40-S:1589213..1589256 | Tc00.1047053508165.110 | 236 mucin-associated surface protein (MASP), putative                    |
| TcChr38-S:247939..247982   | Tc00.1047053508539.60  | 430 mucin-associated surface protein (MASP), putative                    |
| TcChr38-S:266048..266091   | Tc00.1047053508539.160 | -193 mucin-associated surface protein (MASP), putative                   |
| TcChr38-S:272767..272810   | Tc00.1047053510833.20  | -196 mucin-associated surface protein (MASP), putative                   |
| TcChr38-S:301075..301118   | Tc00.1047053508541.20  | -196 mucin-associated surface protein (MASP), putative                   |
| TcChr38-S:394739..401400   | Tc00.1047053510213.70  | 8225 mucin-associated surface protein (MASP), putative                   |
| TcChr38-S:401400..406611   | Tc00.1047053510209.27  | 1420 mucin-associated surface protein (MASP), putative                   |
| TcChr38-S:409527..414421   | Tc00.1047053508125.140 | 600 mucin-associated surface protein (MASP), putative                    |
| TcChr38-S:426189..439457   | Tc00.1047053510207.40  | 1528 mucin-associated surface protein (MASP), putative                   |
| TcChr38-S:1107367..1108376 | Tc00.1047053511173.100 | 826, 1835 mucin-associated surface protein (MASP), putative              |
| TcChr38-S:1128094..1158444 | Tc00.1047053511173.180 | 422 mucin-associated surface protein (MASP), putative                    |
| TcChr38-S:1166341..1173998 | Tc00.1047053511173.360 | 848 mucin-associated surface protein (MASP), putative                    |
| TcChr38-S:1173998..1178292 | Tc00.1047053511173.400 | 596 mucin-associated surface protein (MASP), putative                    |
| TcChr38-S:1178292..1189229 | Tc00.1047053511173.430 | 184 mucin-associated surface protein (MASP), putative                    |
| TcChr38-S:1189229..1190869 | Tc00.1047053511173.460 | 3288 mucin-associated surface protein (MASP), putative                   |
| TcChr15-S:145732..145775   | Tc00.1047053511875.80  | 349, 1169 mucin-associated surface protein (MASP), putative              |
| TcChr15-S:406196..406239   | Tc00.1047053507553.41  | 1147 mucin-associated surface protein (MASP), putative                   |
| TcChr28-S:206547..206590   | Tc00.1047053508389.50  | 5293 mucin-associated surface protein (MASP), putative                   |
| TcChr28-S:258884..258927   | Tc00.1047053510621.20  | 354 mucin-associated surface protein (MASP), putative                    |
| TcChr28-S:283614..283657   | Tc00.1047053511785.10  | 347 mucin-associated surface protein (MASP), putative                    |
| TcChr28-S:310564..310607   | Tc00.1047053511791.10  | 363 mucin-associated surface protein (MASP), putative                    |
| TcChr28-S:314733..314776   | Tc00.1047053511793.30  | 352 mucin-associated surface protein (MASP), putative                    |
| TcChr28-P:229668..229711   | Tc00.1047053510391.20  | 343 mucin-associated surface protein (MASP), putative                    |
| TcChr16-S:68002..68045     | Tc00.1047053506269.40  | 143 mucin-associated surface protein (MASP), putative                    |
| TcChr18-P:299253..299296   | Tc00.1047053508247.50  | 303 mucin-associated surface protein (MASP, pseudogene), putative        |
| TcChr41-P:668159..668202   | Tc00.1047053507937.20  | 367 mucin-associated surface protein (MASP, pseudogene), putative        |
| TcChr41-P:889264..889307   | Tc00.1047053508873.103 | 349 mucin-associated surface protein (MASP, pseudogene), putative        |
| TcChr41-P:1131344..1131387 | Tc00.1047053511255.580 | 77 mucin-associated surface protein (MASP, pseudogene), putative         |
| TcChr41-P:2011185..2011228 | Tc00.1047053510361.209 | 363 mucin-associated surface protein (MASP, pseudogene), putative        |
| TcChr41-P:2136831..2136874 | Tc00.1047053510359.680 | 310 mucin-associated surface protein (MASP, pseudogene), putative        |
| TcChr29-S:62416..62459     | Tc00.1047053509699.140 | 385 mucin-associated surface protein (MASP, pseudogene), putative        |
| TcChr41-S:1176085..1176128 | Tc00.1047053510021.109 | 3719 mucin-associated surface protein (MASP, pseudogene), putative       |
| TcChr38-S:447248..448367   | Tc00.1047053510207.21  | 846, 1965 mucin-associated surface protein (MASP, pseudogene), putative  |
| TcChr38-S:482604..483532   | Tc00.1047053508121.130 | 1115, 2043 mucin-associated surface protein (MASP, pseudogene), putative |
| TcChr38-S:489267..491003   | Tc00.1047053508121.90  | 1401 mucin-associated surface protein (MASP, pseudogene), putative       |
| TcChr38-S:1112205..1128094 | Tc00.1047053511173.120 | 1029 mucin-associated surface protein (MASP, pseudogene), putative       |
| TcChr28-S:462472..462515   | Tc00.1047053506973.90  | 357 mucin-associated surface protein (MASP, pseudogene), putative        |

|                            |                        |                                                                                            |
|----------------------------|------------------------|--------------------------------------------------------------------------------------------|
| TcChr29-S:506987..507030   | Tc00.1047053506289.94  | 529 mucin-like glycoprotein, putative                                                      |
| TcChr37-S:616562..616605   | Tc00.1047053504103.30  | 399 myosin heavy chain, putative                                                           |
| TcChr38-S:213368..213411   | Tc00.1047053503841.80  | 107, 238, 606 NADH-dependent fumarate reductase, putative                                  |
| TcChr38-S:220360..220403   | Tc00.1047053508535.10  | 266 NADH-dependent fumarate reductase, putative                                            |
| TcChr38-S:370810..370961   | Tc00.1047053503467.9   | 165, 316 NADH-dependent fumarate reductase, putative                                       |
| TcChr38-S:376104..376214   | Tc00.1047053510215.10  | 109, 219, 437 NADH-dependent fumarate reductase, putative                                  |
| TcChr38-S:383288..385038   | Tc00.1047053510213.110 | 5693 NADH-dependent fumarate reductase, putative                                           |
| TcChr39-P:977130..977173   | Tc00.1047053510729.140 | 1455 NIMA-related kinase, putative                                                         |
| TcChr7-P:276778..276821    | Tc00.1047053509353.40  | 454 NLI-interacting factor, putative                                                       |
| TcChr7-S:276768..276811    | Tc00.1047053430605.20  | 455 NLI-interacting factor, putative                                                       |
| TcChr38-S:364250..364625   | Tc00.1047053427355.10  | 319, 694 oligosaccharyl transferase subunit, putative                                      |
| TcChr38-S:367077..367222   | Tc00.1047053503467.30  | 2037, 2182 oligosaccharyl transferase subunit, putative                                    |
| TcChr22-S:310166..310209   | Tc00.1047053504427.150 | 901 oxidoreductase-like protein, putative                                                  |
| TcChr29-S:731800..731843   | Tc00.1047053508211.10  | 891 oxysterol-binding protein, putative                                                    |
| TcChr2-P:80416..80459      | Tc00.1047053509541.4   | 892 paraflagellar rod component par4, putative                                             |
| TcChr19-P:153362..153405   | Tc00.1047053509611.20  | 96 peptidyl-prolyl cis-trans isomerase/rotamase, putative,PPIase, putative                 |
| TcChr34-S:326867..326910   | Tc00.1047053505989.74  | 1793 peroxisome biogenesis factor 1, putative                                              |
| TcChr38-S:146151..146194   | Tc00.1047053511001.70  | 298 phosphatidylinositol-4-phosphate 5-kinase-like, putative                               |
| TcChr18-P:116101..116144   | Tc00.1047053508851.189 | 23 phosphoenolpyruvate mutase, putative                                                    |
| TcChr39-P:1204223..1204266 | Tc00.1047053508461.140 | 3046, 3719, 3904 poly(A)-binding protein, putative,polyadenylate-binding protein, putative |
| TcChr29-S:471789..471832   | Tc00.1047053506287.140 | 85 prefoldin, putative                                                                     |
| TcChr38-S:49299..49342     | Tc00.1047053511469.70  | 189 prohibitin, putative                                                                   |
| TcChr24-S:690968..691011   | Tc00.1047053506411.30  | 309 proline oxidase, putative                                                              |
| TcChr38-S:202226..202269   | Tc00.1047053503841.10  | 877 proteasome activator protein pa26, putative                                            |
| TcChr15-S:38766..38809     | Tc00.1047053511867.50  | 253 proteasome alpha 7 subunit, putative                                                   |
| TcChr29-S:737791..737834   | Tc00.1047053508209.140 | 433, 1087 protein disulfide isomerase, putative                                            |
| TcChr35-S:1115717..1115760 | Tc00.1047053510911.45  | 129 protein kinase (pseudogene), putative                                                  |
| TcChr10-P:509497..509540   | Tc00.1047053507503.11  | 183 protein kinase (pseudogene), putative                                                  |
| TcChr40-P:703436..703479   | Tc00.1047053511277.520 | 2657 protein kinase (pseudogene), putative,glycogen synthase kinase, frameshift            |
| TcChr11-S:30861..30904     | Tc00.1047053510307.191 | 131 protein kinase (pseudogene), putative,protein kinase, putative, frameshift             |
| TcChr19-P:289416..289459   | Tc00.1047053509605.30  | 895, 2266 Protein kinase domain, putative                                                  |
| TcChr41-P:177245..177288   | Tc00.1047053509027.60  | 2499 protein kinase, putative                                                              |
| TcChr41-P:181458..181501   | Tc00.1047053509027.70  | 2292 protein kinase, putative                                                              |
| TcChr33-S:957353..957396   | Tc00.1047053510347.5   | 477 protein kinase, putative                                                               |
| TcChr29-S:649604..649647   | Tc00.1047053477079.10  | 936, 1922, 2154, 3178, 3872 protein kinase, putative                                       |
| TcChr29-S:850936..850979   | Tc00.1047053508207.20  | 131 protein kinase, putative                                                               |
| TcChr23-P:616026..616069   | Tc00.1047053506537.130 | 131 protein kinase, putative                                                               |
| TcChr38-S:19493..19536     | Tc00.1047053511471.60  | 138 protein kinase, putative                                                               |
| TcChr38-S:140809..140852   | Tc00.1047053511001.60  | 587, 837, 1219, 1513, 2140 protein kinase, putative                                        |
| TcChr15-S:20868..20911     | Tc00.1047053509231.20  | 317 protein kinase, putative                                                               |
| TcChr13-S:509857..509900   | Tc00.1047053508325.130 | 131 protein kinase, putative                                                               |
| TcChr13-S:554415..554458   | Tc00.1047053508325.320 | 134 protein kinase, putative                                                               |
| TcChr19-P:231925..231968   | Tc00.1047053509607.50  | 1297 protein kinase, putative                                                              |
| TcChr25-S:273403..273446   | Tc00.1047053507275.10  | 269, 410, 981 protein kinase, putative                                                     |
| TcChr3-S:17395..17438      | Tc00.1047053511055.50  | 135 protein kinase, putative                                                               |
| TcChr22-P:43092..43135     | Tc00.1047053509725.50  | 134 protein kinase, putative                                                               |
| TcChr22-P:50671..50714     | Tc00.1047053509723.10  | 132 protein kinase, putative                                                               |
| TcChr10-S:484892..484935   | Tc00.1047053504229.30  | 137 protein kinase, putative                                                               |
| TcChr11-P:445637..445680   | Tc00.1047053509937.130 | 3544 protein kinase, putative                                                              |
| TcChr11-P:464236..464279   | Tc00.1047053509937.220 | 1058 protein kinase, putative                                                              |
| TcChr7-P:341983..342026    | Tc00.1047053510045.30  | 1707 protein kinase, putative                                                              |

|                            |                        |                                                                             |
|----------------------------|------------------------|-----------------------------------------------------------------------------|
| TcChr19-S:318277..318320   | Tc00.1047053506401.110 | 279 protein kinase, putative                                                |
| TcChr37-S:10111..10154     | Tc00.1047053507611.40  | 143 protein kinase, putative                                                |
| TcChr36-S:1164391..1164434 | Tc00.1047053507881.60  | 134 protein kinase, putative                                                |
| TcChr37-P:50365..50408     | Tc00.1047053503423.20  | 132 protein kinase, putative                                                |
| TcChr25-P:772148..772191   | Tc00.1047053509259.130 | 346 protein kinase, putative                                                |
| TcChr17-P:11446..11489     | Tc00.1047053511773.50  | 126 protein kinase, putative                                                |
| TcChr32-P:42969..43012     | Tc00.1047053503607.10  | 126 protein kinase, putative                                                |
| TcChr5-S:17599..17642      | Tc00.1047053510247.20  | 38 protein kinase, putative,casein kinase I, putative                       |
| TcChr34-S:657347..657390   | Tc00.1047053510231.10  | 263 protein kinase, putative                                                |
| TcChr1-P:49535..49578      | Tc00.1047053505037.60  | 137 protein kinase, putative                                                |
| TcChr40-P:599059..599102   | Tc00.1047053511283.130 | 454, 798 protein kinase, putative,serine/threonine protein kinase, putative |
| TcChr27-S:330199..330242   | Tc00.1047053506775.190 | 489 protein kinase, putative,serine/threonine protein kinase, putative      |
| TcChr15-S:82425..82468     | Tc00.1047053511871.34  | 506 protein transport protein sec61 gamma subunit, putative                 |
| TcChr29-S:785308..785351   | Tc00.1047053503579.110 | 163 pseudouridylate synthase I, putative                                    |
| TcChr5-S:18907..18950      | Tc00.1047053510247.10  | 233 R27-2 protein, putative                                                 |
| TcChr35-S:1111443..1111486 | Tc00.1047053510911.30  | 212 ras-related rab-4, putative                                             |
| TcChr25-S:621256..621299   | Tc00.1047053506743.180 | 594 recombination initiation protein NBS1, putative                         |
| TcChr29-S:709098..709141   | Tc00.1047053508213.9   | 521 regulator of chromosome condensation, putative                          |
| TcChr18-P:119423..119466   | Tc00.1047053508851.210 | 412 replication factor C, subunit 4, putative                               |
| TcChr32-P:710572..710615   | Tc00.1047053511517.37  | 36 reticulon domain protein, putative                                       |
| TcChr18-P:75143..75186     | Tc00.1047053511227.20  | 1244 retrotransposon hot spot protein (RHS, pseudogene), putative           |
| TcChr40-P:2024183..2024183 | Tc00.1047053508527.20  | 3216 retrotransposon hot spot protein (RHS, pseudogene), putative           |
| TcChr39-P:1431555..1431598 | Tc00.1047053510661.174 | 81 riboflavin kinase, putative                                              |
| TcChr30-S:279168..279211   | Tc00.1047053506933.20  | 753 ribonucleoside-diphosphate reductase large chain, putative              |
| TcChr30-S:283187..283230   | Tc00.1047053504073.30  | 746 ribonucleoside-diphosphate reductase large chain, putative              |
| TcChr15-S:300818..300861   | Tc00.1047053509233.190 | 364 ribosomal protein S25, putative                                         |
| TcChr7-P:161052..161095    | Tc00.1047053509943.30  | 820 ribosomal protein S6, putative,NPH2/RS6-like protein, putative          |
| TcChr29-S:790582..790625   | Tc00.1047053503579.150 | 319 RNA editing 3' terminal uridylyl transferase 2, putative                |
| TcChr10-S:392995..393038   | Tc00.1047053511139.40  | 1455, 1644 RNA helicase, putative                                           |
| TcChr10-P:392956..392999   | Tc00.1047053508319.40  | 1357 RNA helicase, putative                                                 |
| TcChr40-P:147472..147515   | Tc00.1047053508901.20  | 7573 RNA-binding protein 4, putative                                        |
| TcChr41-P:99132..99175     | Tc00.1047053511481.70  | 389, 1268 RNA-binding protein 5, putative                                   |
| TcChr40-S:413990..414033   | Tc00.1047053506211.60  | 56 RNA-binding protein, putative                                            |
| TcChr22-S:405199..405242   | Tc00.1047053510507.50  | 5714 RNA-binding protein, putative                                          |
| TcChr40-P:413098..413141   | Tc00.1047053508895.60  | 55 RNA-binding protein, putative                                            |
| TcChr40-P:775888..775931   | Tc00.1047053511277.200 | 4011 RNA-binding protein, putative                                          |
| TcChr34-S:98823..98866     | Tc00.1047053507873.30  | 87 RNA-binding protein, putative                                            |
| TcChr32-S:356560..356603   | Tc00.1047053509965.180 | 420 RNA-binding protein, putative                                           |
| TcChr38-S:105648..105691   | Tc00.1047053503453.100 | 125, 273, 709, 824, 1341 serine palmitoyltransferase, putative              |
| TcChr38-P:1392866..1392909 | Tc00.1047053508001.106 | 106 serine/threonine protein kinase (pseudogene), putative                  |
| TcChr37-S:1082431..1082474 | Tc00.1047053509599.157 | 948 serine/threonine protein kinase, putative                               |
| TcChr13-S:447102..447145   | Tc00.1047053506863.80  | 60, 454, 780 serine/threonine protein phosphatase, putative                 |
| TcChr33-S:688944..688987   | Tc00.1047053506465.50  | 1904 serine/threonine protein phosphatase-like protein, putative            |
| TcChr15-S:341915..341958   | Tc00.1047053509453.50  | 482 serine/threonine-protein phosphatase 2A, catalytic subunit, putative    |
| TcChr34-S:479873..479916   | Tc00.1047053510879.10  | 1586 serine/threonine-protein phosphatase 2A, catalytic subunit, putative   |
| TcChr34-S:991663..991706   | Tc00.1047053438059.10  | 1023, 1327 serine/threonine-protein phosphatase PP1 alpha                   |
| TcChr18-P:313995..314038   | Tc00.1047053508247.110 | 270 serine-alanine-and proline-rich protein, putative                       |
| TcChr41-P:318296..318339   | Tc00.1047053511487.150 | 4575 serine-alanine-and proline-rich protein, putative                      |
| TcChr12-P:365071..365114   | Tc00.1047053506151.30  | 1591 small GTP-binding protein Rab11, putative,Rab11 GTPase, putative       |
| TcChr29-S:504710..504753   | Tc00.1047053506289.80  | 1177 small GTP-binding protein, putative                                    |
| TcChr29-S:814477..814520   | Tc00.1047053508207.200 | 205 small GTP-binding protein, putative                                     |

|                            |                        |                                                                  |
|----------------------------|------------------------|------------------------------------------------------------------|
| TcChr37-S:892027..892070   | Tc00.1047053507709.90  | 116 sterol C-24 reductase, putative                              |
| TcChr40-P:1934387..1936535 | Tc00.1047053508479.340 | 631 succinyl-CoA synthetase alpha subunit, putative              |
| TcChr29-S:543331..543374   | Tc00.1047053506289.250 | 448 surface protease GP63 (pseudogene), putative                 |
| TcChr24-S:73576..73619     | Tc00.1047053503665.40  | 644 surface protease GP63 (pseudogene), putative                 |
| TcChr18-P:353548..353591   | Tc00.1047053473703.10  | 3051 surface protease GP63, putative                             |
| TcChr29-S:518387..518430   | Tc00.1047053506289.140 | 134 surface protease GP63, putative                              |
| TcChr29-S:526737..526780   | Tc00.1047053506289.170 | 134 surface protease GP63, putative                              |
| TcChr29-S:534963..535006   | Tc00.1047053506289.210 | 87 surface protease GP63, putative                               |
| TcChr34-S:324577..324620   | Tc00.1047053505989.70  | 319 surface protease GP63, putative, metalloproteinase, putative |
| TcChr35-P:894807..894850   | Tc00.1047053511723.10  | 317 surface protease GP63, putative, metalloproteinase, putative |
| TcChr5-S:170792..170835    | Tc00.1047053508955.10  | -56 syntaxin, putative                                           |
| TcChr38-S:1288147..1296745 | Tc00.1047053511181.80  | 1785 threonyl-tRNA synthetase, putative                          |
| TcChr25-S:365615..365658   | Tc00.1047053503477.20  | 956 transaldolase, putative                                      |
| TcChr22-S:401826..401869   | Tc00.1047053510507.40  | 787 transmembrane amino acid transporter, putative               |
| TcChr28-S:665903..665946   | Tc00.1047053509885.70  | 315, 679, 1827 transporter, putative                             |
| TcChr18-P:285238..285281   | Tc00.1047053508245.45  | 348 trans-sialidase (pseudogene), putative                       |
| TcChr18-P:403176..403219   | Tc00.1047053506139.2   | 361 trans-sialidase (pseudogene), putative                       |
| TcChr18-P:408211..408254   | Tc00.1047053504155.280 | 104 trans-sialidase (pseudogene), putative                       |
| TcChr18-P:471047..471090   | Tc00.1047053509545.55  | 348 trans-sialidase (pseudogene), putative                       |
| TcChr18-P:476189..476232   | Tc00.1047053509545.40  | 130 trans-sialidase (pseudogene), putative                       |
| TcChr41-P:858717..858760   | Tc00.1047053503973.340 | 75 trans-sialidase (pseudogene), putative                        |
| TcChr41-P:1014313..1014356 | Tc00.1047053508877.10  | 80 trans-sialidase (pseudogene), putative                        |
| TcChr41-P:1042702..1042745 | Tc00.1047053511255.110 | 91 trans-sialidase (pseudogene), putative                        |
| TcChr41-P:1051588..1051631 | Tc00.1047053511255.160 | 138 trans-sialidase (pseudogene), putative                       |
| TcChr41-P:1074723..1074766 | Tc00.1047053511255.270 | 84 trans-sialidase (pseudogene), putative                        |
| TcChr41-P:1633152..1633195 | Tc00.1047053510363.60  | 76 trans-sialidase (pseudogene), putative                        |
| TcChr41-P:1882119..1882162 | Tc00.1047053508221.530 | 71 trans-sialidase (pseudogene), putative                        |
| TcChr41-P:2021998..2022041 | Tc00.1047053510361.180 | 77 trans-sialidase (pseudogene), putative                        |
| TcChr41-P:2065166..2065209 | Tc00.1047053508219.170 | 78 trans-sialidase (pseudogene), putative                        |
| TcChr41-P:2113766..2113809 | Tc00.1047053506751.90  | 70 trans-sialidase (pseudogene), putative                        |
| TcChr33-S:36327..36370     | Tc00.1047053511585.310 | 74 trans-sialidase (pseudogene), putative                        |
| TcChr33-S:452600..452643   | Tc00.1047053510557.10  | 83 trans-sialidase (pseudogene), putative                        |
| TcChr29-S:15609..15652     | Tc00.1047053506285.30  | 162, 228 trans-sialidase (pseudogene), putative                  |
| TcChr29-S:83877..83920     | Tc00.1047053509699.220 | 90 trans-sialidase (pseudogene), putative                        |
| TcChr29-S:416419..416462   | Tc00.1047053507747.130 | 81 trans-sialidase (pseudogene), putative                        |
| TcChr33-P:780601..780644   | Tc00.1047053506615.10  | 126 trans-sialidase (pseudogene), putative                       |
| TcChr33-P:799447..799490   | Tc00.1047053508113.20  | 70 trans-sialidase (pseudogene), putative                        |
| TcChr20-S:473333..473376   | Tc00.1047053508147.70  | 558 trans-sialidase (pseudogene), putative                       |
| TcChr20-S:510924..510967   | Tc00.1047053508149.60  | 75 trans-sialidase (pseudogene), putative                        |
| TcChr20-S:536647..536690   | Tc00.1047053506667.50  | 80 trans-sialidase (pseudogene), putative                        |
| TcChr24-S:9790..9833       | Tc00.1047053509921.20  | 1330 trans-sialidase (pseudogene), putative                      |
| TcChr24-S:28588..28631     | Tc00.1047053503985.10  | 335 trans-sialidase (pseudogene), putative                       |
| TcChr24-S:78445..78488     | Tc00.1047053503665.10  | 2320 trans-sialidase (pseudogene), putative                      |
| TcChr24-S:722321..722364   | Tc00.1047053503957.25  | 407 trans-sialidase (pseudogene), putative                       |
| TcChr16-P:83890..83933     | Tc00.1047053509753.20  | 87 trans-sialidase (pseudogene), putative                        |
| TcChr41-S:2146791..2146834 | Tc00.1047053506759.90  | 82 trans-sialidase (pseudogene), putative                        |
| TcChr29-P:141943..141986   | Tc00.1047053508983.20  | 80 trans-sialidase (pseudogene), putative                        |
| TcChr29-P:197236..197279   | Tc00.1047053506279.250 | 85 trans-sialidase (pseudogene), putative                        |
| TcChr29-P:322101..322144   | Tc00.1047053511259.170 | 81 trans-sialidase (pseudogene), putative                        |
| TcChr29-P:396185..396228   | Tc00.1047053506993.160 | 83 trans-sialidase (pseudogene), putative                        |
| TcChr38-P:294222..294265   | Tc00.1047053506955.170 | 76 trans-sialidase (pseudogene), putative                        |



|                            |                         |                                                 |
|----------------------------|-------------------------|-------------------------------------------------|
| TcChr23-S:588657..588700   | Tc00.1047053509735.140  | 150 trans-sialidase (pseudogene), putative      |
| TcChr40-S:1149443..1149486 | Tc00.1047053510269.60   | 92 trans-sialidase (pseudogene), putative       |
| TcChr40-S:1171251..1171294 | Tc00.1047053510271.30   | 92 trans-sialidase (pseudogene), putative       |
| TcChr40-S:1198048..1198091 | Tc00.1047053510275.110  | 176 trans-sialidase (pseudogene), putative      |
| TcChr40-S:1609135..1609178 | Tc00.1047053508165.200  | 84 trans-sialidase (pseudogene), putative       |
| TcChr38-S:22308..22351     | Tc00.1047053511471.20   | 4007 trans-sialidase (pseudogene), putative     |
| TcChr38-S:259098..259141   | Tc00.1047053508539.130  | 109 trans-sialidase (pseudogene), putative      |
| TcChr38-S:316865..316908   | Tc00.1047053508541.120  | 110 trans-sialidase (pseudogene), putative      |
| TcChr38-S:491003..499041   | Tc00.1047053508121.30   | 655 trans-sialidase (pseudogene), putative      |
| TcChr15-S:107195..107238   | Tc00.1047053511871.150  | 121, 930 trans-sialidase (pseudogene), putative |
| TcChr15-S:124104..124147   | Tc00.1047053511873.30   | 680 trans-sialidase (pseudogene), putative      |
| TcChr15-S:150319..150362   | Tc00.1047053511875.110  | 644 trans-sialidase (pseudogene), putative      |
| TcChr2-S:124310..124353    | Tc00.1047053506717.130  | 82 trans-sialidase (pseudogene), putative       |
| TcChr28-S:622094..622137   | Tc00.1047053456627.10   | 732 trans-sialidase (pseudogene), putative      |
| TcChr5-S:196977..197020    | Tc00.1047053511371.5    | 151 trans-sialidase (pseudogene), putative      |
| TcChr24-P:571752..571795   | Tc00.1047053509525.20   | 102 trans-sialidase (pseudogene), putative      |
| TcChr40-P:7152..7195       | Tc00.1047053506331.50   | 880 trans-sialidase (pseudogene), putative      |
| TcChr40-P:7921..7964       | Tc00.1047053506331.50   | 111 trans-sialidase (pseudogene), putative      |
| TcChr34-S:23377..23420     | Tc00.1047053507875.130  | 222 trans-sialidase (pseudogene), putative      |
| TcChr25-S:697086..697129   | Tc00.1047053508559.80   | 73 trans-sialidase (pseudogene), putative       |
| TcChr9-P:406289..406332    | Tc00.1047053508999.120  | 83 trans-sialidase (pseudogene), putative       |
| TcChr28-P:473304..473347   | Tc00.1047053510627.30   | 80 trans-sialidase (pseudogene), putative       |
| TcChr12-P:525656..525699   | Tc00.1047053503861.30   | 381 trans-sialidase (pseudogene), putative      |
| TcChr15-P:253962..254005   | Tc00.1047053509437.125  | 152 trans-sialidase (pseudogene), putative      |
| TcChr15-P:298303..298346   | Tc00.1047053503769.20   | 202 trans-sialidase (pseudogene), putative      |
| TcChr36-S:3590..3633       | Tc00.1047053506343.41   | 445 trans-sialidase (pseudogene), putative      |
| TcChr31-P:72957..73000     | Tc00.1047053509915.50   | 994 trans-sialidase (pseudogene), putative      |
| TcChr12-S:241177..241220   | Tc00.1047053505943.95   | 147 trans-sialidase (pseudogene), putative      |
| TcChr39-S:946608..946651   | Tc00.1047053506885.140  | 799 trans-sialidase (pseudogene), putative      |
| TcChr18-P:67323..67366     | Tc00.1047053511223.20   | 440, 1226 trans-sialidase, putative             |
| TcChr18-P:188031..188074   | Tc00.1047053511233.140  | 90, 162 trans-sialidase, putative               |
| TcChr18-P:256166..256209   | Tc00.1047053510239.80   | 104 trans-sialidase, putative                   |
| TcChr18-P:309469..309512   | Tc00.1047053508247.90   | 85 trans-sialidase, putative                    |
| TcChr18-P:371463..371506   | Tc00.1047053506139.120  | 105 trans-sialidase, putative                   |
| TcChr41-P:301907..301950   | Tc00.1047053511487.90   | 81 trans-sialidase, putative                    |
| TcChr41-P:566717..566760   | Tc00.1047053506389.10   | 71 trans-sialidase, putative                    |
| TcChr41-P:602658..602701   | Tc00.1047053506459.230  | 71 trans-sialidase, putative                    |
| TcChr41-P:622447..622490   | Tc00.1047053506459.180  | 70 trans-sialidase, putative                    |
| TcChr41-P:677146..677189   | Tc00.1047053507937.3    | 74 trans-sialidase, putative                    |
| TcChr41-P:735464..735507   | Tc00.1047053508871.10   | 73 trans-sialidase, putative                    |
| TcChr41-P:763702..763745   | Tc00.1047053508871.110  | 70 trans-sialidase, putative                    |
| TcChr41-P:773041..773084   | Tc00.1047053508871.170  | 124 trans-sialidase, putative                   |
| TcChr41-P:932298..932341   | Tc00.1047053508873.330  | 86 trans-sialidase, putative                    |
| TcChr41-P:948180..948223   | Tc00.1047053508873.390  | 79 trans-sialidase, putative                    |
| TcChr41-P:1060191..1060234 | Tc00.1047053511255.190  | 76 trans-sialidase, putative                    |
| TcChr41-P:1093821..1093864 | Tc00.1047053511255.350  | 82 trans-sialidase, putative                    |
| TcChr41-P:1596762..1596805 | Tc00.1047053510363.250  | 76 trans-sialidase, putative                    |
| TcChr41-P:1648458..1648501 | Tc00.1047053504081.540  | 81 trans-sialidase, putative                    |
| TcChr41-P:1745867..1745910 | Tc00.1047053504081.80   | 81 trans-sialidase, putative                    |
| TcChr41-P:1768702..1768745 | Tc00.1047053508221.1050 | 80 trans-sialidase, putative                    |
| TcChr41-P:1797816..1797859 | Tc00.1047053508221.870  | 80 trans-sialidase, putative                    |

|                            |                        |                                   |
|----------------------------|------------------------|-----------------------------------|
| TcChr41-P:1818228..1818271 | Tc00.1047053508221.790 | 82 trans-sialidase, putative      |
| TcChr41-P:1828610..1828653 | Tc00.1047053508221.750 | 76 trans-sialidase, putative      |
| TcChr41-P:1851721..1851764 | Tc00.1047053508221.650 | 81 trans-sialidase, putative      |
| TcChr41-P:1865890..1865933 | Tc00.1047053508221.590 | 81 trans-sialidase, putative      |
| TcChr41-P:1916555..1916598 | Tc00.1047053508221.400 | 79 trans-sialidase, putative      |
| TcChr41-P:1963428..1963471 | Tc00.1047053508221.180 | 80 trans-sialidase, putative      |
| TcChr41-P:2099340..2099383 | Tc00.1047053508219.20  | 80 trans-sialidase, putative      |
| TcChr41-P:2168938..2168981 | Tc00.1047053510359.530 | 82 trans-sialidase, putative      |
| TcChr33-S:246927..246970   | Tc00.1047053507699.230 | 84 trans-sialidase, putative      |
| TcChr33-S:528269..528312   | Tc00.1047053508343.10  | 541 trans-sialidase, putative     |
| TcChr29-S:47956..47999     | Tc00.1047053509699.40  | 84, 175 trans-sialidase, putative |
| TcChr33-P:758490..758533   | Tc00.1047053506615.150 | 71 trans-sialidase, putative      |
| TcChr33-P:810721..810764   | Tc00.1047053510033.30  | 70 trans-sialidase, putative      |
| TcChr20-S:546452..546495   | Tc00.1047053506667.90  | 82 trans-sialidase, putative      |
| TcChr20-S:561287..561330   | Tc00.1047053506667.160 | 82 trans-sialidase, putative      |
| TcChr20-S:578172..578215   | Tc00.1047053508099.50  | 83 trans-sialidase, putative      |
| TcChr20-S:594103..594146   | Tc00.1047053508103.30  | 83 trans-sialidase, putative      |
| TcChr20-S:617518..617561   | Tc00.1047053506609.30  | 79 trans-sialidase, putative      |
| TcChr20-S:652290..652333   | Tc00.1047053508109.60  | 80 trans-sialidase, putative      |
| TcChr24-S:197457..197500   | Tc00.1047053506951.90  | 227 trans-sialidase, putative     |
| TcChr24-S:231915..231958   | Tc00.1047053511677.20  | 101 trans-sialidase, putative     |
| TcChr24-S:238683..238726   | Tc00.1047053468217.30  | 101 trans-sialidase, putative     |
| TcChr24-S:647504..647547   | Tc00.1047053506409.170 | 86 trans-sialidase, putative      |
| TcChr24-S:707255..707298   | Tc00.1047053505363.10  | 128 trans-sialidase, putative     |
| TcChr24-S:765592..765635   | Tc00.1047053505365.60  | 83 trans-sialidase, putative      |
| TcChr20-P:475091..475134   | Tc00.1047053509217.40  | 79 trans-sialidase, putative      |
| TcChr20-P:519087..519130   | Tc00.1047053511839.40  | 83 trans-sialidase, putative      |
| TcChr16-P:10801..10844     | Tc00.1047053509755.50  | 87 trans-sialidase, putative      |
| TcChr18-S:226798..226841   | Tc00.1047053511597.10  | 90 trans-sialidase, putative      |
| TcChr18-S:355964..356007   | Tc00.1047053511603.450 | 73 trans-sialidase, putative      |
| TcChr18-S:563230..563273   | Tc00.1047053509097.20  | 71 trans-sialidase, putative      |
| TcChr41-S:22528..22571     | Tc00.1047053511123.11  | 333 trans-sialidase, putative     |
| TcChr41-S:990745..990788   | Tc00.1047053506597.40  | 70 trans-sialidase, putative      |
| TcChr41-S:1126638..1126681 | Tc00.1047053510025.50  | 83 trans-sialidase, putative      |
| TcChr41-S:1161198..1161241 | Tc00.1047053510021.180 | 69 trans-sialidase, putative      |
| TcChr41-S:1337342..1337385 | Tc00.1047053507953.10  | 93 trans-sialidase, putative      |
| TcChr41-S:1755371..1755414 | Tc00.1047053510377.330 | 82 trans-sialidase, putative      |
| TcChr21-P:24987..25030     | Tc00.1047053416041.14  | 1119 trans-sialidase, putative    |
| TcChr21-P:202780..202823   | Tc00.1047053511643.110 | 80 trans-sialidase, putative      |
| TcChr4-S:157813..157856    | Tc00.1047053510107.15  | 745 trans-sialidase, putative     |
| TcChr4-S:172672..172715    | Tc00.1047053508047.60  | 85 trans-sialidase, putative      |
| TcChr23-P:169309..169352   | Tc00.1047053460111.10  | 333 trans-sialidase, putative     |
| TcChr23-P:201304..201347   | Tc00.1047053509665.30  | 397 trans-sialidase, putative     |
| TcChr29-P:79679..79722     | Tc00.1047053508979.50  | 86 trans-sialidase, putative      |
| TcChr29-P:153523..153566   | Tc00.1047053506279.10  | 83 trans-sialidase, putative      |
| TcChr29-P:164649..164692   | Tc00.1047053506279.60  | 86 trans-sialidase, putative      |
| TcChr29-P:177623..177666   | Tc00.1047053506279.140 | 88 trans-sialidase, putative      |
| TcChr29-P:246661..246704   | Tc00.1047053507633.80  | 81 trans-sialidase, putative      |
| TcChr29-P:305300..305343   | Tc00.1047053508887.5   | 84 trans-sialidase, putative      |
| TcChr29-P:365444..365487   | Tc00.1047053508883.48  | 230 trans-sialidase, putative     |
| TcChr38-P:272233..272276   | Tc00.1047053506955.270 | 80 trans-sialidase, putative      |

|                            |                        |                                                                                           |
|----------------------------|------------------------|-------------------------------------------------------------------------------------------|
| TcChr38-P:280926..280969   | Tc00.1047053506955.240 | 73 trans-sialidase, putative                                                              |
| TcChr38-P:985411..985454   | Tc00.1047053510713.90  | 92 trans-sialidase, putative                                                              |
| TcChr23-S:184757..184800   | Tc00.1047053503601.10  | 83 trans-sialidase, putative                                                              |
| TcChr40-S:1481956..1481999 | Tc00.1047053510279.110 | 130 trans-sialidase, putative                                                             |
| TcChr40-S:1567270..1567313 | Tc00.1047053418405.30  | 84 trans-sialidase, putative                                                              |
| TcChr38-S:1085794..1086264 | Tc00.1047053511173.10  | 6407, 6877 trans-sialidase, putative                                                      |
| TcChr38-S:1158444..1158485 | Tc00.1047053511173.280 | 6138, 6179 trans-sialidase, putative                                                      |
| TcChr38-S:1190869..1190909 | Tc00.1047053511173.470 | 931, 971, 1007, 1103 trans-sialidase, putative                                            |
| TcChr14-S:245348..245391   | Tc00.1047053506737.90  | 84 trans-sialidase, putative                                                              |
| TcChr15-S:119555..119598   | Tc00.1047053511873.10  | 119 trans-sialidase, putative                                                             |
| TcChr15-S:133779..133822   | Tc00.1047053511875.20  | 108 trans-sialidase, putative                                                             |
| TcChr22-S:248908..248951   | Tc00.1047053504425.10  | 97 trans-sialidase, putative                                                              |
| TcChr28-S:428605..428648   | Tc00.1047053506973.10  | 204 trans-sialidase, putative                                                             |
| TcChr28-S:602571..602614   | Tc00.1047053507861.24  | 167 trans-sialidase, putative                                                             |
| TcChr24-P:457331..457374   | Tc00.1047053509527.120 | 83 trans-sialidase, putative                                                              |
| TcChr24-P:626893..626936   | Tc00.1047053508365.190 | 84 trans-sialidase, putative                                                              |
| TcChr25-S:381157..381200   | Tc00.1047053511401.120 | 82 trans-sialidase, putative                                                              |
| TcChr25-S:399638..399681   | Tc00.1047053511401.30  | 89 trans-sialidase, putative                                                              |
| TcChr25-S:410685..410728   | Tc00.1047053508977.120 | 106 trans-sialidase, putative                                                             |
| TcChr25-S:417991..418034   | Tc00.1047053508977.80  | 106 trans-sialidase, putative                                                             |
| TcChr22-P:227083..227126   | Tc00.1047053508677.40  | 1245 trans-sialidase, putative                                                            |
| TcChr35-S:750488..750531   | Tc00.1047053509157.170 | 589 trans-sialidase, putative                                                             |
| TcChr12-P:472655..472698   | Tc00.1047053506053.50  | 211, 1119 trans-sialidase, putative                                                       |
| TcChr12-P:481748..481791   | Tc00.1047053504183.20  | 1035 trans-sialidase, putative                                                            |
| TcChr12-P:522282..522325   | Tc00.1047053503861.40  | 937 trans-sialidase, putative                                                             |
| TcChr15-P:553610..553653   | Tc00.1047053510197.180 | 130 trans-sialidase, putative                                                             |
| TcChr15-P:560519..560562   | Tc00.1047053510197.130 | 131 trans-sialidase, putative                                                             |
| TcChr30-P:773857..773900   | Tc00.1047053511669.10  | 983 trans-sialidase, putative                                                             |
| TcChr30-P:807143..807186   | Tc00.1047053511667.30  | 852 trans-sialidase, putative                                                             |
| TcChr25-P:64189..64232     | Tc00.1047053508963.30  | 865 trans-sialidase, putative                                                             |
| TcChr21-P:234459..234502   | Tc00.1047053507059.20  | 82 trans-sialidase, putative,c71 surface protein, putative                                |
| TcChr29-S:389613..389656   | Tc00.1047053509701.10  | 286068 trifunctional enzyme alpha subunit, mitochondrial precursor-like protein, putative |
| TcChr4-S:124087..124130    | Tc00.1047053510105.187 | 369 tRNA-Gly:anticodon GCC                                                                |
| TcChr39-P:974567..974610   | Tc00.1047053510729.150 | 438 tubulin tyrosine ligase, putative                                                     |
| TcChr38-S:226715..226758   | Tc00.1047053508535.50  | 281 tyrosine aminotransferase                                                             |
| TcChr38-S:1261692..1261722 | Tc00.1047053511179.160 | 23923, 23953, 23976, 24924, 24975, 31088, 31143 ubiquitin-conjugating enzyme e2, putative |
| TcChr19-P:461437..461480   | Tc00.1047053508547.201 | 162 ubiquitin-protein ligase, putative                                                    |
| TcChr19-P:475197..475240   | Tc00.1047053508971.50  | 1265, 1624 ubiquitin-protein ligase-like, putative                                        |
| TcChr28-S:83005..83048     | Tc00.1047053510611.20  | 643 UDP-glucuronic acid/UDP-N-acetylgalactosamine transporter, putative                   |
| TcChr38-S:191657..191700   | Tc00.1047053511001.190 | 20 vacuolar ATP synthase subunit d, putative                                              |

**Supplementary Table S3**

Genes containing the UBP1m and 43-nt elements

| <b>GeneID</b>          | <b>UBP1m location<br/>in 3'UTR</b> | <b>43-nt location in<br/>3'UTR</b> | <b>Distance between<br/>elements &lt; 300 nt</b> |
|------------------------|------------------------------------|------------------------------------|--------------------------------------------------|
| Tc00.1047053508805.20  | 70                                 | 1851                               |                                                  |
| Tc00.1047053510325.20  | 253                                | 1156                               |                                                  |
| Tc00.1047053507649.20  | 276                                | 493                                | Yes                                              |
| Tc00.1047053510309.60  | 164                                | 65                                 | Yes                                              |
| Tc00.1047053508387.170 | 271                                | 372                                | Yes                                              |
| Tc00.1047053504073.10  | 13                                 | 1830                               |                                                  |
| Tc00.1047053511001.90  | 137                                | 781                                |                                                  |
| Tc00.1047053503579.150 | 224                                | 319                                | Yes                                              |
| Tc00.1047053510729.210 | 35                                 | 2876                               |                                                  |
| Tc00.1047053506543.100 | 257                                | 1544                               |                                                  |
| Tc00.1047053508541.210 | 305                                | 50                                 | Yes                                              |
| Tc00.1047053425855.9   | 227                                | 1456                               |                                                  |
| Tc00.1047053508547.190 | 242                                | 723                                |                                                  |
| Tc00.1047053511685.60  | 183                                | 97                                 | Yes                                              |
| Tc00.1047053511263.30  | 59                                 | 647                                |                                                  |
| Tc00.1047053509027.70  | 265                                | 2292                               |                                                  |
| Tc00.1047053510105.187 | 190                                | 369                                | Yes                                              |
| Tc00.1047053511531.30  | 237                                | 1374                               |                                                  |
| Tc00.1047053503453.100 | 40                                 | 125                                | Yes                                              |
| Tc00.1047053510105.250 | 203                                | 16                                 | Yes                                              |
| Tc00.1047053508541.200 | 195                                | 1766                               |                                                  |
| Tc00.1047053507041.40  | 326                                | 105                                | Yes                                              |
| Tc00.1047053506289.50  | 80                                 | 525                                |                                                  |
| Tc00.1047053506135.30  | 106                                | 322                                | Yes                                              |
| Tc00.1047053398751.10  | 126                                | 729                                |                                                  |
| Tc00.1047053509455.20  | 301                                | 547                                | Yes                                              |
| Tc00.1047053510231.10  | 167                                | 263                                | Yes                                              |
| Tc00.1047053506559.550 | 313                                | 392                                | Yes                                              |
| Tc00.1047053503477.10  | 291                                | 604                                |                                                  |
| Tc00.1047053503579.110 | 83                                 | 163                                | Yes                                              |
| Tc00.1047053509233.180 | 110                                | 407                                | Yes                                              |
| Tc00.1047053506885.354 | 249                                | 378                                | Yes                                              |
| Tc00.1047053510611.20  | 245                                | 643                                |                                                  |
| Tc00.1047053404843.10  | 29                                 | 318                                | Yes                                              |
| Tc00.1047053511467.50  | 177                                | 237                                | Yes                                              |
| Tc00.1047053509233.170 | 307                                | 448                                | Yes                                              |
| Tc00.1047053509433.10  | 227                                | 2645                               |                                                  |
| Tc00.1047053506859.80  | 16                                 | 1211                               |                                                  |
| Tc00.1047053408437.20  | 264                                | 571                                |                                                  |
| Tc00.1047053509701.10  | 38                                 | 286068                             |                                                  |
| Tc00.1047053510611.70  | 302                                | 445                                | Yes                                              |
| Tc00.1047053509233.120 | 12                                 | 413                                |                                                  |
| Tc00.1047053507811.100 | 32                                 | 162                                | Yes                                              |
| Tc00.1047053511181.100 | 72                                 | 4967                               |                                                  |
| Tc00.1047053507143.90  | 119                                | 4195                               |                                                  |

|                        |     |      |     |
|------------------------|-----|------|-----|
| Tc00.1047053507747.260 | 227 | 427  | Yes |
| Tc00.1047053507059.80  | 43  | 1125 |     |
| Tc00.1047053510999.19  | 317 | 563  | Yes |
| Tc00.1047053507275.20  | 31  | 754  |     |
| Tc00.1047053506287.20  | 24  | 515  |     |
| Tc00.1047053511467.16  | 7   | 133  | Yes |
| Tc00.1047053509455.130 | 94  | 155  | Yes |
| Tc00.1047053408437.10  | 70  | 973  |     |
| Tc00.1047053506807.20  | 295 | 2544 |     |
| Tc00.1047053511217.100 | 257 | 82   | Yes |
| Tc00.1047053503899.110 | 148 | 481  |     |
| Tc00.1047053508373.10  | 35  | 1124 |     |
| Tc00.1047053508389.10  | 83  | 783  |     |
| Tc00.1047053509885.70  | 48  | 315  | Yes |
| Tc00.1047053509231.20  | 235 | 317  | Yes |
| Tc00.1047053508387.30  | 169 | 1128 |     |
| Tc00.1047053511871.30  | 250 | 1135 |     |
| Tc00.1047053506775.190 | 60  | 489  |     |
| Tc00.1047053509231.10  | 100 | 1108 |     |
| Tc00.1047053511313.30  | 125 | 375  | Yes |
| Tc00.1047053507063.40  | 309 | 2661 |     |
| Tc00.1047053511181.140 | 320 | 928  |     |
| Tc00.1047053503841.20  | 246 | 761  |     |
| Tc00.1047053509125.10  | 230 | 1921 |     |
| Tc00.1047053511181.150 | 19  | 2130 |     |
| Tc00.1047053505807.140 | 286 | 51   | Yes |
| Tc00.1047053506553.40  | 273 | 9    | Yes |
| Tc00.1047053503939.70  | 172 | 465  | Yes |
| Tc00.1047053508593.100 | 164 | 386  | Yes |
| Tc00.1047053506713.30  | 95  | 235  | Yes |
| Tc00.1047053511215.90  | 278 | 678  |     |
| Tc00.1047053509455.110 | 187 | 303  | Yes |
| Tc00.1047053510615.4   | 218 | 62   | Yes |
| Tc00.1047053508569.10  | 247 | 7492 |     |
| Tc00.1047053503939.50  | 304 | 562  | Yes |
| Tc00.1047053429257.20  | 145 | 612  |     |
| Tc00.1047053511481.70  | 212 | 389  | Yes |
| Tc00.1047053511181.80  | 76  | 1785 |     |
| Tc00.1047053506305.29  | 191 | 403  | Yes |
| Tc00.1047053509179.60  | 114 | 1302 |     |
| Tc00.1047053511871.34  | 152 | 506  |     |
| Tc00.1047053511001.30  | 251 | 201  | Yes |
| Tc00.1047053510359.290 | 31  | 673  |     |
| Tc00.1047053509231.50  | 309 | 856  |     |
| Tc00.1047053503565.29  | 118 | 1542 |     |
| Tc00.1047053511179.130 | 132 | 199  | Yes |
| Tc00.1047053504045.100 | 109 | 691  |     |
| Tc00.1047053511001.60  | 26  | 587  |     |

|                        |     |      |     |
|------------------------|-----|------|-----|
| Tc00.1047053506135.50  | 55  | 287  | Yes |
| Tc00.1047053468217.30  | 312 | 101  | Yes |
| Tc00.1047053510613.10  | 12  | 103  | Yes |
| Tc00.1047053508385.40  | 19  | 480  |     |
| Tc00.1047053509243.20  | 311 | 3651 |     |
| Tc00.1047053504103.30  | 293 | 399  | Yes |
| Tc00.1047053506749.10  | 67  | 1991 |     |
| Tc00.1047053485889.10  | 98  | 608  |     |
| Tc00.1047053509455.80  | 206 | 63   | Yes |
| Tc00.1047053508965.70  | 144 | 5384 |     |
| Tc00.1047053509229.20  | 211 | 1174 |     |
| Tc00.1047053503841.10  | 173 | 877  |     |
| Tc00.1047053506713.24  | 34  | 298  | Yes |
| Tc00.1047053509233.200 | 93  | 30   | Yes |
| Tc00.1047053510517.110 | 325 | 879  |     |
| Tc00.1047053511871.60  | 299 | 377  | Yes |
| Tc00.1047053511467.4   | 294 | 484  | Yes |
| Tc00.1047053510359.120 | 318 | 434  | Yes |
| Tc00.1047053510729.60  | 258 | 897  |     |
| Tc00.1047053509541.4   | 22  | 892  |     |
| Tc00.1047053506165.4   | 244 | 840  |     |
| Tc00.1047053508839.40  | 137 | 384  | Yes |
| Tc00.1047053511867.70  | 50  | 90   | Yes |
| Tc00.1047053509233.60  | 1   | 295  | Yes |
| Tc00.1047053507709.90  | 286 | 116  | Yes |
| Tc00.1047053510911.30  | 183 | 212  | Yes |
| Tc00.1047053510609.120 | 219 | 157  | Yes |
| Tc00.1047053506503.150 | 26  | 261  | Yes |
| Tc00.1047053511751.220 | 210 | 340  | Yes |
| Tc00.1047053511181.30  | 40  | 503  |     |
| Tc00.1047053507063.80  | 37  | 1049 |     |
| Tc00.1047053508209.150 | 323 | 204  | Yes |
| Tc00.1047053509233.80  | 8   | 208  | Yes |
| Tc00.1047053509233.239 | 263 | 272  | Yes |
| Tc00.1047053510999.10  | 188 | 822  |     |
| Tc00.1047053511585.190 | 154 | 371  | Yes |
| Tc00.1047053511487.150 | 201 | 4575 |     |
| Tc00.1047053505989.70  | 142 | 319  | Yes |
| Tc00.1047053508383.10  | 156 | 62   | Yes |
| Tc00.1047053506937.20  | 69  | 112  | Yes |
| Tc00.1047053508209.94  | 71  | 98   | Yes |
| Tc00.1047053511001.80  | 110 | 2    | Yes |
| Tc00.1047053509233.220 | 68  | 116  | Yes |
| Tc00.1047053503579.30  | 185 | 498  |     |
| Tc00.1047053509609.10  | 322 | 218  | Yes |
| Tc00.1047053508211.50  | 271 | 107  | Yes |
| Tc00.1047053511001.170 | 176 | 741  |     |
| Tc00.1047053506745.10  | 262 | 504  | Yes |

|                        |     |      |     |
|------------------------|-----|------|-----|
| Tc00.1047053506287.9   | 145 | 2437 |     |
| Tc00.1047053508219.20  | 326 | 80   | Yes |
| Tc00.1047053503973.340 | 319 | 75   | Yes |
| Tc00.1047053510361.180 | 287 | 77   | Yes |
| Tc00.1047053511553.200 | 318 | 84   | Yes |
| Tc00.1047053506737.90  | 282 | 84   | Yes |
| Tc00.1047053508963.30  | 312 | 865  |     |
| Tc00.1047053508109.60  | 314 | 80   | Yes |
| Tc00.1047053510713.90  | 296 | 92   | Yes |
| Tc00.1047053509921.20  | 275 | 1330 |     |
| Tc00.1047053510377.330 | 289 | 82   | Yes |
| Tc00.1047053511173.280 | 317 | 6138 |     |
| Tc00.1047053511401.120 | 321 | 82   | Yes |
| Tc00.1047053510271.30  | 257 | 92   | Yes |
| Tc00.1047053510269.60  | 257 | 92   | Yes |
| Tc00.1047053511669.10  | 284 | 983  |     |
| Tc00.1047053503861.40  | 294 | 937  |     |
| Tc00.1047053508221.870 | 72  | 80   | Yes |
| Tc00.1047053509455.140 | 36  | 318  | Yes |
| Tc00.1047053509543.30  | 179 | 795  |     |
| Tc00.1047053506303.90  | 138 | 225  | Yes |
| Tc00.1047053508207.60  | 242 | 59   | Yes |
| Tc00.1047053503453.4   | 91  | 636  |     |
| Tc00.1047053509455.60  | 236 | 147  | Yes |
| Tc00.1047053510879.10  | 297 | 1586 |     |
| Tc00.1047053510347.20  | 31  | 586  |     |
| Tc00.1047053511181.40  | 5   | 1278 |     |
| Tc00.1047053508539.130 | 302 | 109  | Yes |
| Tc00.1047053510045.30  | 27  | 1707 |     |
| Tc00.1047053509605.30  | 26  | 895  |     |
| Tc00.1047053511303.9   | 123 | 1605 |     |
| Tc00.1047053511181.10  | 23  | 158  | Yes |
| Tc00.1047053511217.170 | 57  | 680  |     |
| Tc00.1047053509455.114 | 175 | 1124 |     |
| Tc00.1047053506289.40  | 212 | 1274 |     |
| Tc00.1047053504073.20  | 320 | 568  | Yes |
| Tc00.1047053509895.60  | 295 | 196  | Yes |
| Tc00.1047053508207.200 | 13  | 205  | Yes |
| Tc00.1047053510219.10  | 154 | 30   | Yes |
| Tc00.1047053503813.30  | 130 | 427  | Yes |
| Tc00.1047053506739.140 | 227 | 301  | Yes |
| Tc00.1047053506635.130 | 126 | 502  |     |
| Tc00.1047053509937.130 | 132 | 3544 |     |
| Tc00.1047053511001.70  | 71  | 298  | Yes |
| Tc00.1047053508385.20  | 211 | 66   | Yes |
| Tc00.1047053511867.90  | 136 | 312  | Yes |
| Tc00.1047053506289.80  | 70  | 1177 |     |
| Tc00.1047053507993.70  | 115 | 423  |     |

|                        |     |      |     |
|------------------------|-----|------|-----|
| Tc00.1047053508221.590 | 77  | 81   | Yes |
| Tc00.1047053508347.40  | 305 | 661  |     |
| Tc00.1047053507053.140 | 196 | 272  | Yes |
| Tc00.1047053503579.10  | 123 | 64   | Yes |
| Tc00.1047053508535.20  | 238 | 130  | Yes |
| Tc00.1047053510729.150 | 291 | 438  | Yes |
| Tc00.1047053511217.80  | 214 | 285  | Yes |
| Tc00.1047053509233.140 | 55  | 193  | Yes |
| Tc00.1047053508851.120 | 59  | 304  | Yes |
| Tc00.1047053503477.20  | 115 | 956  |     |
| Tc00.1047053508209.90  | 79  | 278  | Yes |
| Tc00.1047053509525.20  | 174 | 102  | Yes |
| Tc00.1047053511867.60  | 131 | 243  | Yes |
| Tc00.1047053511837.110 | 228 | 143  | Yes |
| Tc00.1047053511277.310 | 155 | 105  | Yes |
| Tc00.1047053508209.144 | 235 | 40   | Yes |
| Tc00.1047053473703.10  | 203 | 3051 |     |
| Tc00.1047053511001.110 | 207 | 141  | Yes |
| Tc00.1047053509875.210 | 257 | 31   | Yes |
| Tc00.1047053511867.20  | 34  | 286  | Yes |
| Tc00.1047053508213.9   | 97  | 521  |     |
| Tc00.1047053510355.200 | 134 | 18   | Yes |
| Tc00.1047053509231.23  | 153 | 700  |     |
| Tc00.1047053511751.160 | 190 | 408  | Yes |
| Tc00.1047053503453.40  | 166 | 215  | Yes |
| Tc00.1047053508865.10  | 276 | 1690 |     |
| Tc00.1047053508461.140 | 288 | 3046 |     |
| Tc00.1047053508209.100 | 2   | 262  | Yes |
| Tc00.1047053511281.10  | 227 | 316  | Yes |



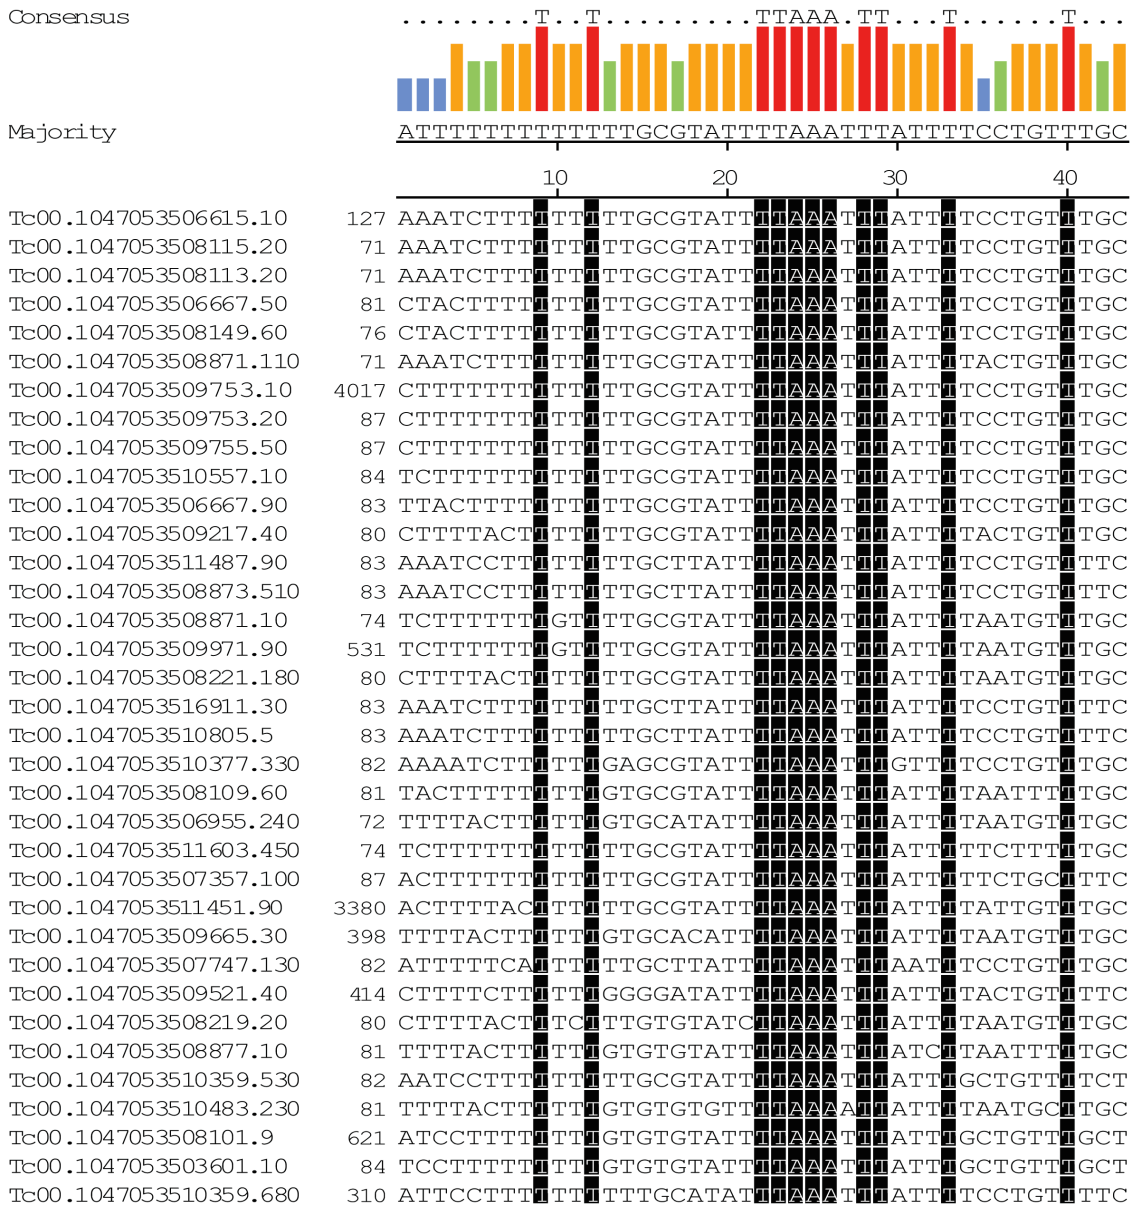

**Figure S1.** Multiple sequence alignment of 35 short fragments obtained from BLASTN searches likely to be present at the 3'UTR of some large gene family members. Systematic gene names are shown at the left. The numbers in the sequences indicate distances from stop codon.

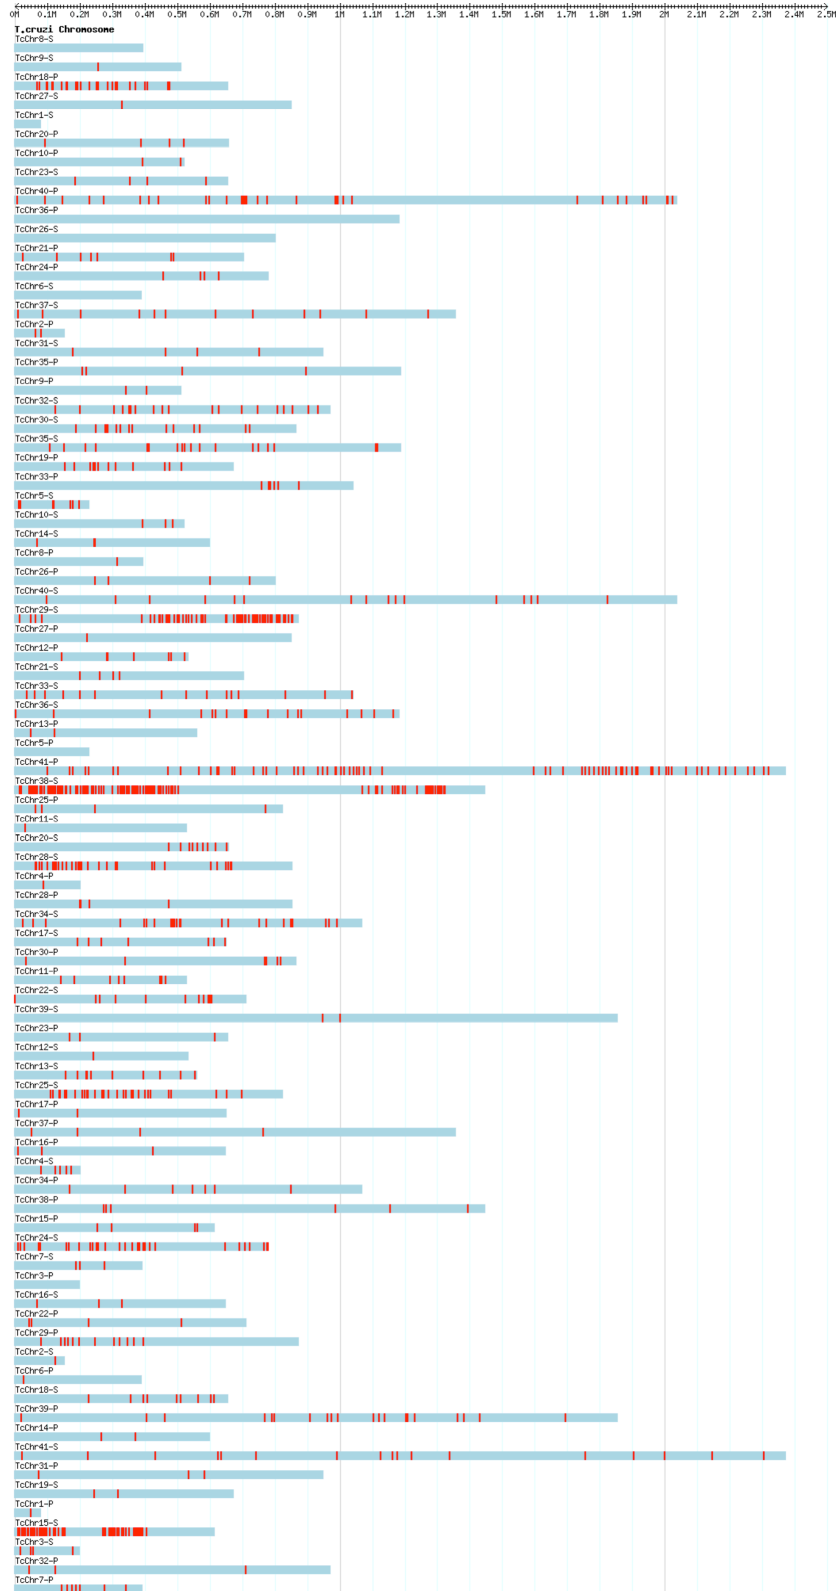

**Figure S2.** Physical localization of the U-rich element in the *T. cruzi* genome. The 43-nt U-rich element (shown in red) is widely distributed on all chromosomes through the genome.
